# Supplementary material for: Mating Disruption of Chilo suppressalis From Sex Pheromone of Another Pyralid Rice Pest Cnaphalocrocis medinalis (Lepidoptera: Pyralidae)
Source: Oxford University Press journal article supplement (doi:10.1093/jisesa/ieaa050), 2020-05-01
Supplement: ieaa050_suppl_supplementary_liang_review_files.zip [file ieaa050_suppl_supplementary_liang_review_files.zip]

Archive with 14 entries (14 files):
- Liang response to reviews.docx
- __MACOSX/._Liang response to reviews.docx
- Liang original figures.docx
- __MACOSX/._Liang original figures.docx
- Liang original version.docx
- __MACOSX/._Liang original version.docx
- Liang decision letter.pdf
- __MACOSX/._Liang decision letter.pdf
- Liang revised version - track changes.docx
- __MACOSX/._Liang revised version - track changes.docx
- Liang revised figures.docx
- __MACOSX/._Liang revised figures.docx
- Liang revised version.docx
- __MACOSX/._Liang revised version.docx
