# Supplementary material for: Mating Disruption of Chilo suppressalis From Sex Pheromone of Another Pyralid Rice Pest Cnaphalocrocis medinalis (Lepidoptera: Pyralidae)
Source: Oxford University Press journal article supplement (doi:10.1093/jisesa/ieaa050), 2020-05-01
Supplement: ieaa050_suppl_supplementary_liang_review_files.zip [file ieaa050_suppl_supplementary_liang_review_files.zip › Liang original figures.docx]

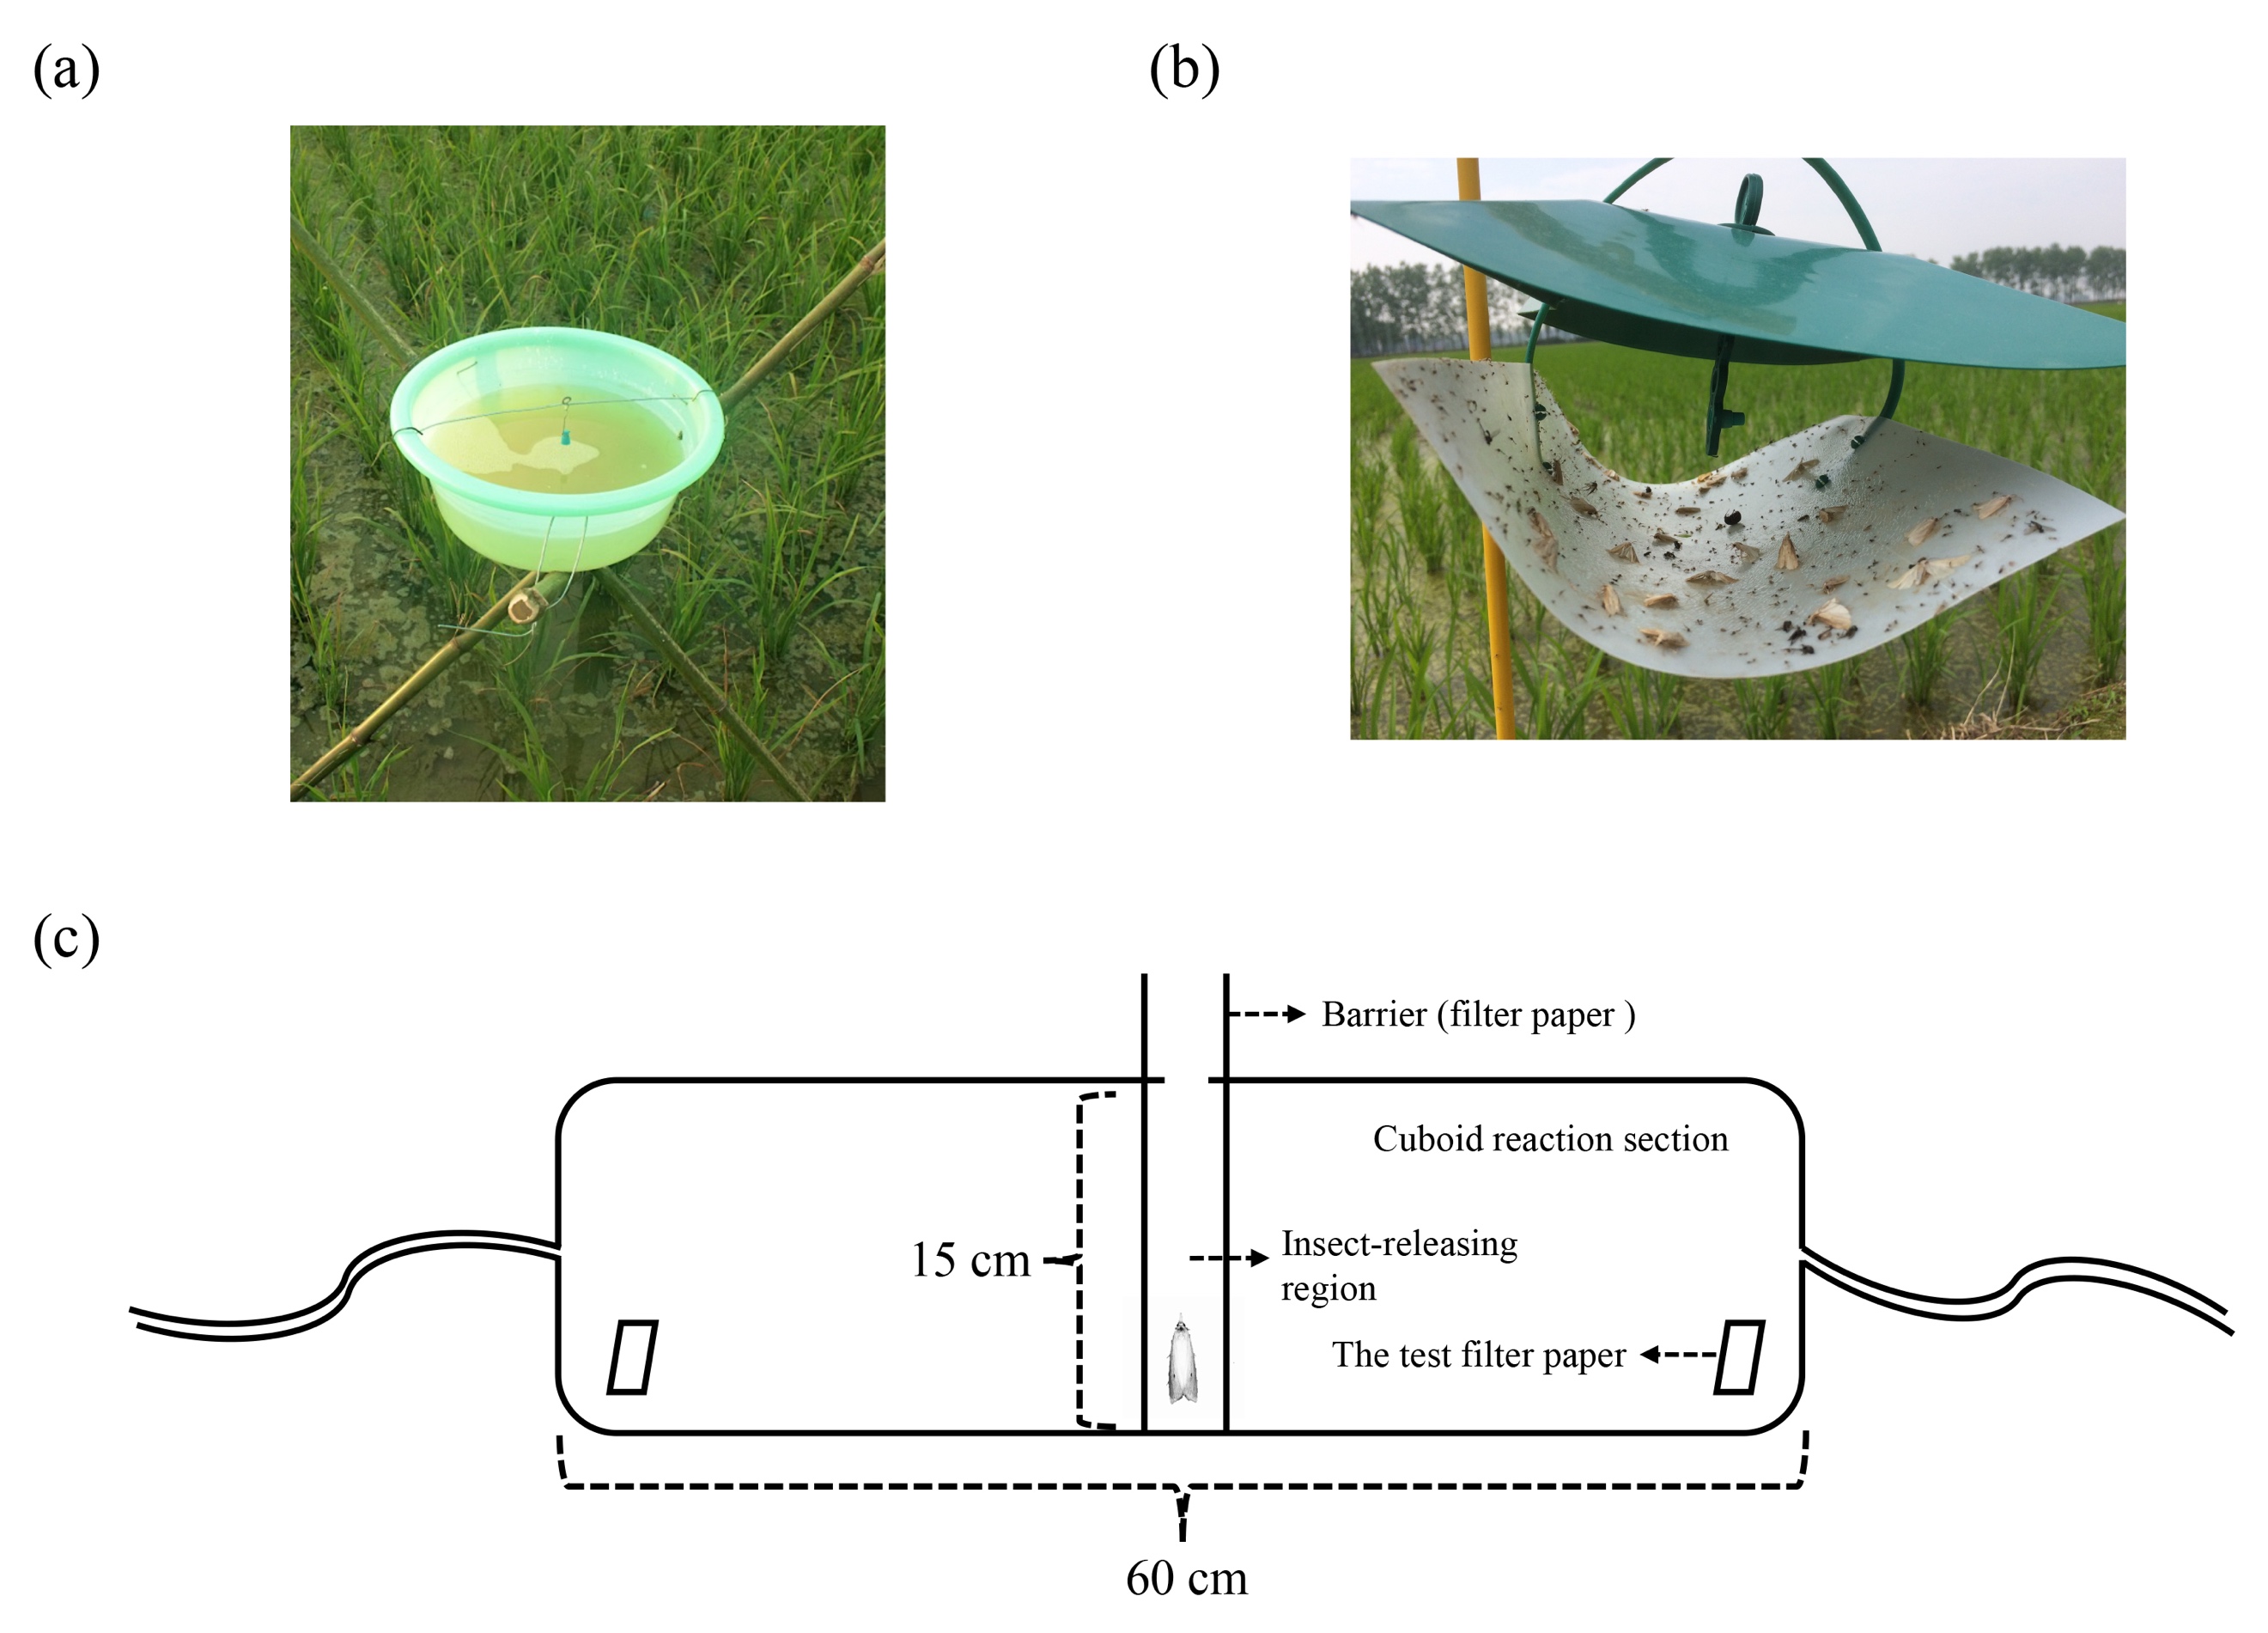


**Fig. 1** The schematic diagrams of three experimental devices in this study. (a) trap 1, (b) trap 2 and (c) olfactometer.


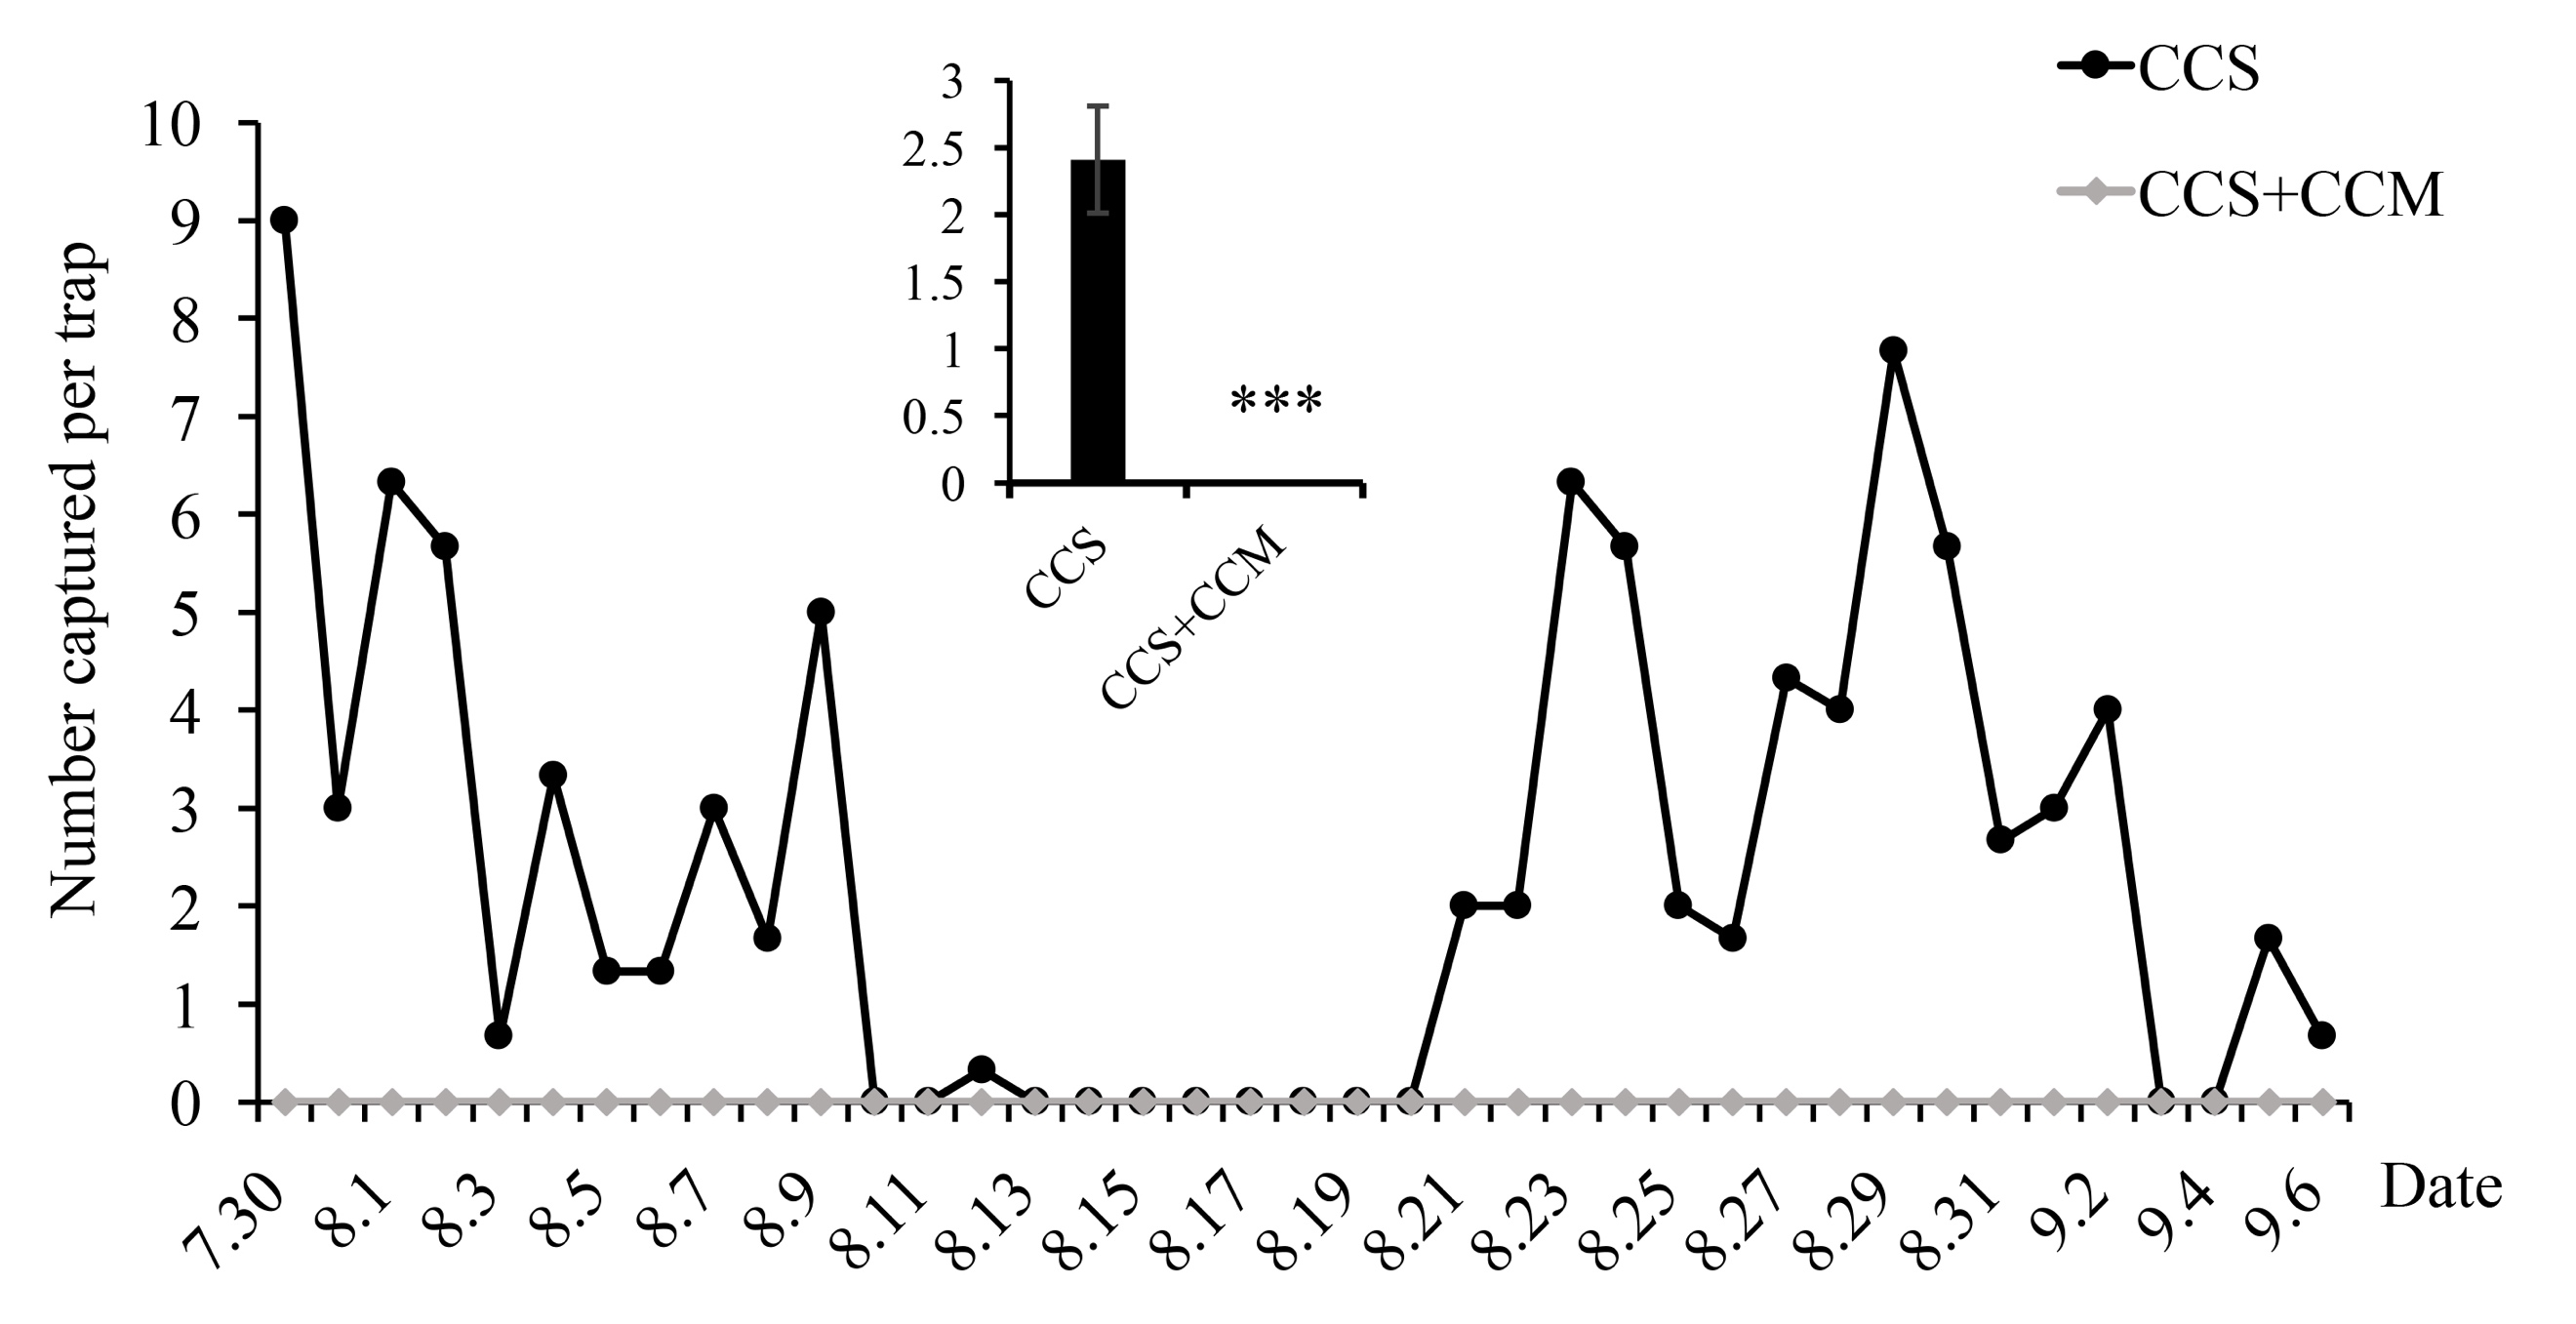


**Fig. 2** The number of *C. suppressalis* males captured by commercial *C. suppressalis* sex pheromone alone (CCS) (black) and combined with commercial *C. medinalis* sex pheromone (CCS+CCM) (gray) in Jiangxi, China, from July to September 2012. We compared the difference of capture of *C. suppressalis* males between treatments and control treatment with a *t*-test. ***, *P* < 0.001.


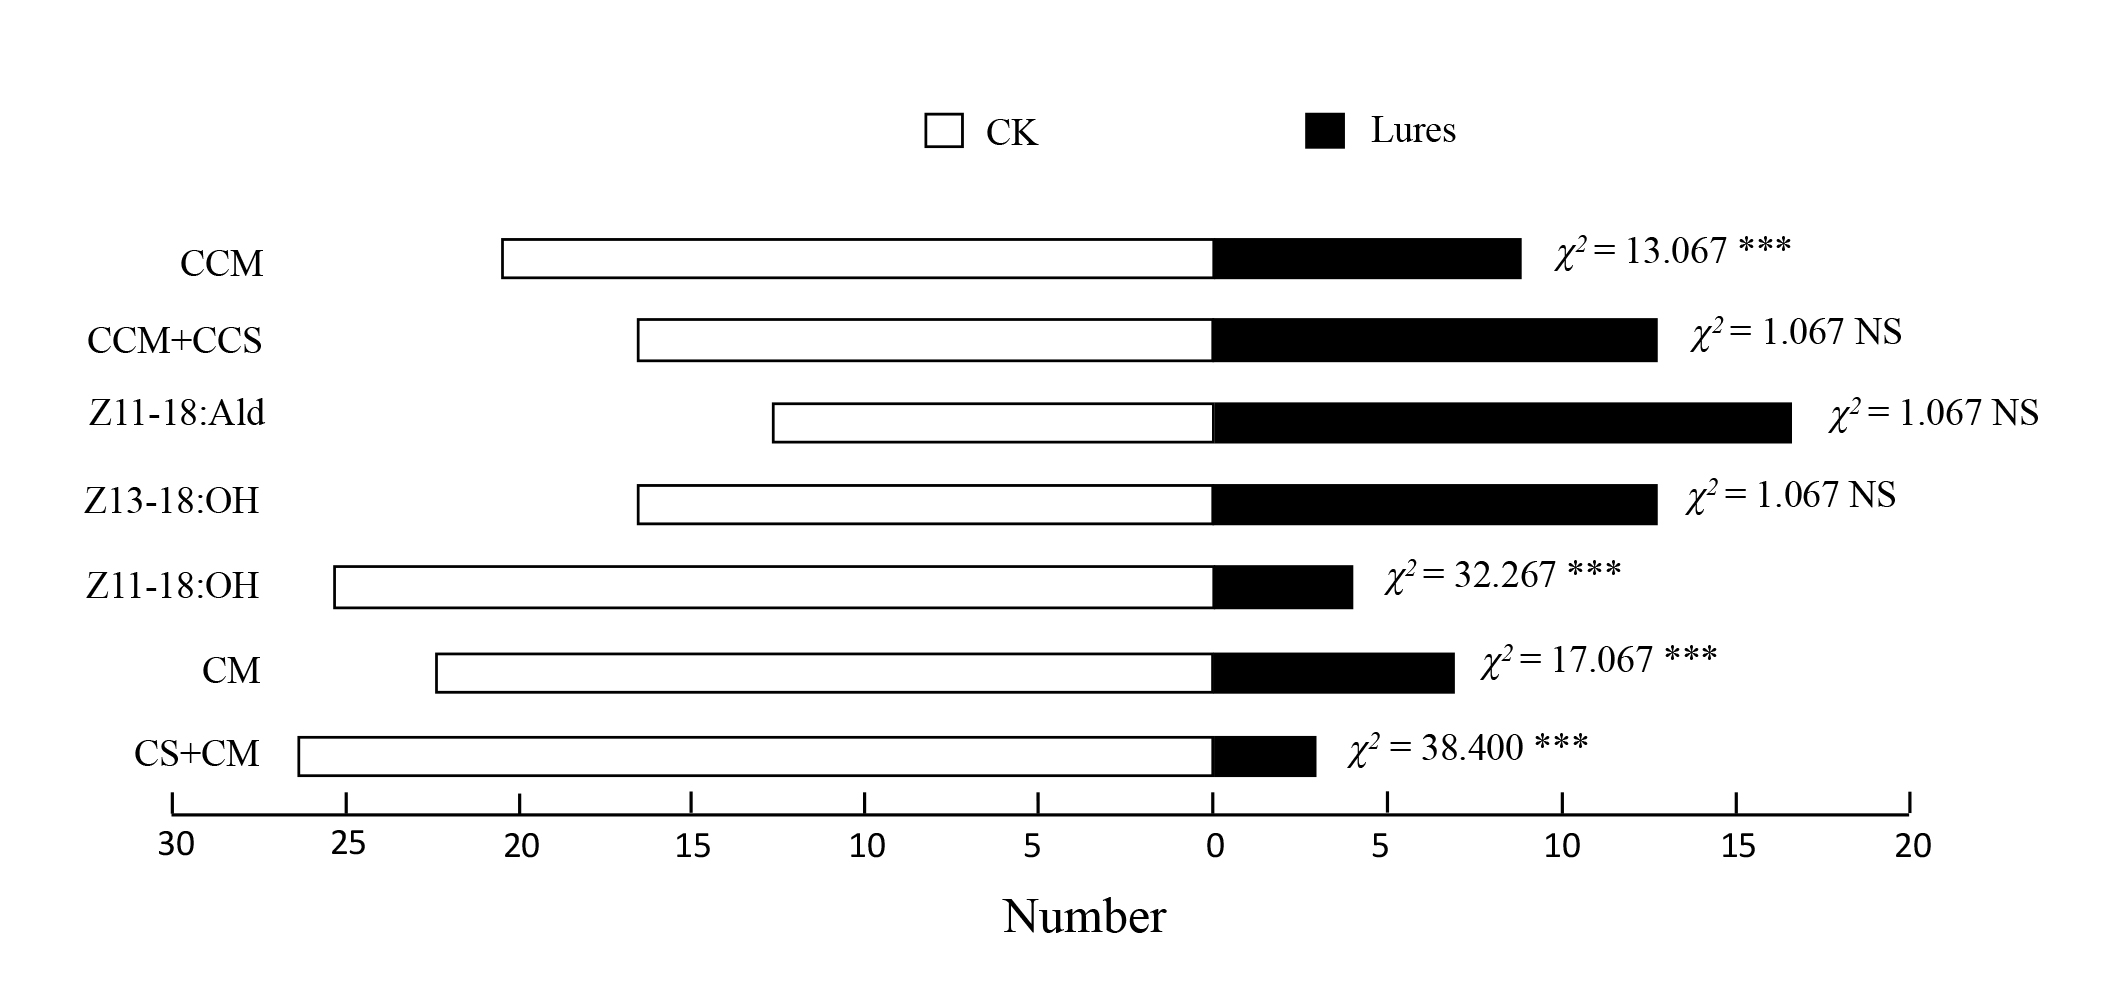


**Fig. 3** Response of male *C. suppressalis* to seven lures over controls in an olfactometer. CCM means commercial *C. medinalis* sex pheromone; CCM+CCS means combination of commercial *C. medinalis* and *C. suppressalis* sex pheromones; CM means the four components of *C. medinalis* sex pheromone (Z13-18:Ald, Z13-18:OH, Z11-18:Ald, Z11-18:OH=100:36:11:24); CS+CM means combination of the components of *C. suppressalis* and *C. medinalis* sex pheromones (Z11-16:Ald, Z13-18:Ald, Z9-16:Ald, Z13-18:OH, Z11-18:Ald, Z11-18:OH=46:106:5:36:11:24). The concentrations of the lures are 1 μg/μl except the two commercial sex pheromones. The control (CK) is redistilled hexane. Significance levels of χ2 (*Chi*-square test) indicated by *** (*P* < 0.001) or NS (no significant difference). *N* = 30.


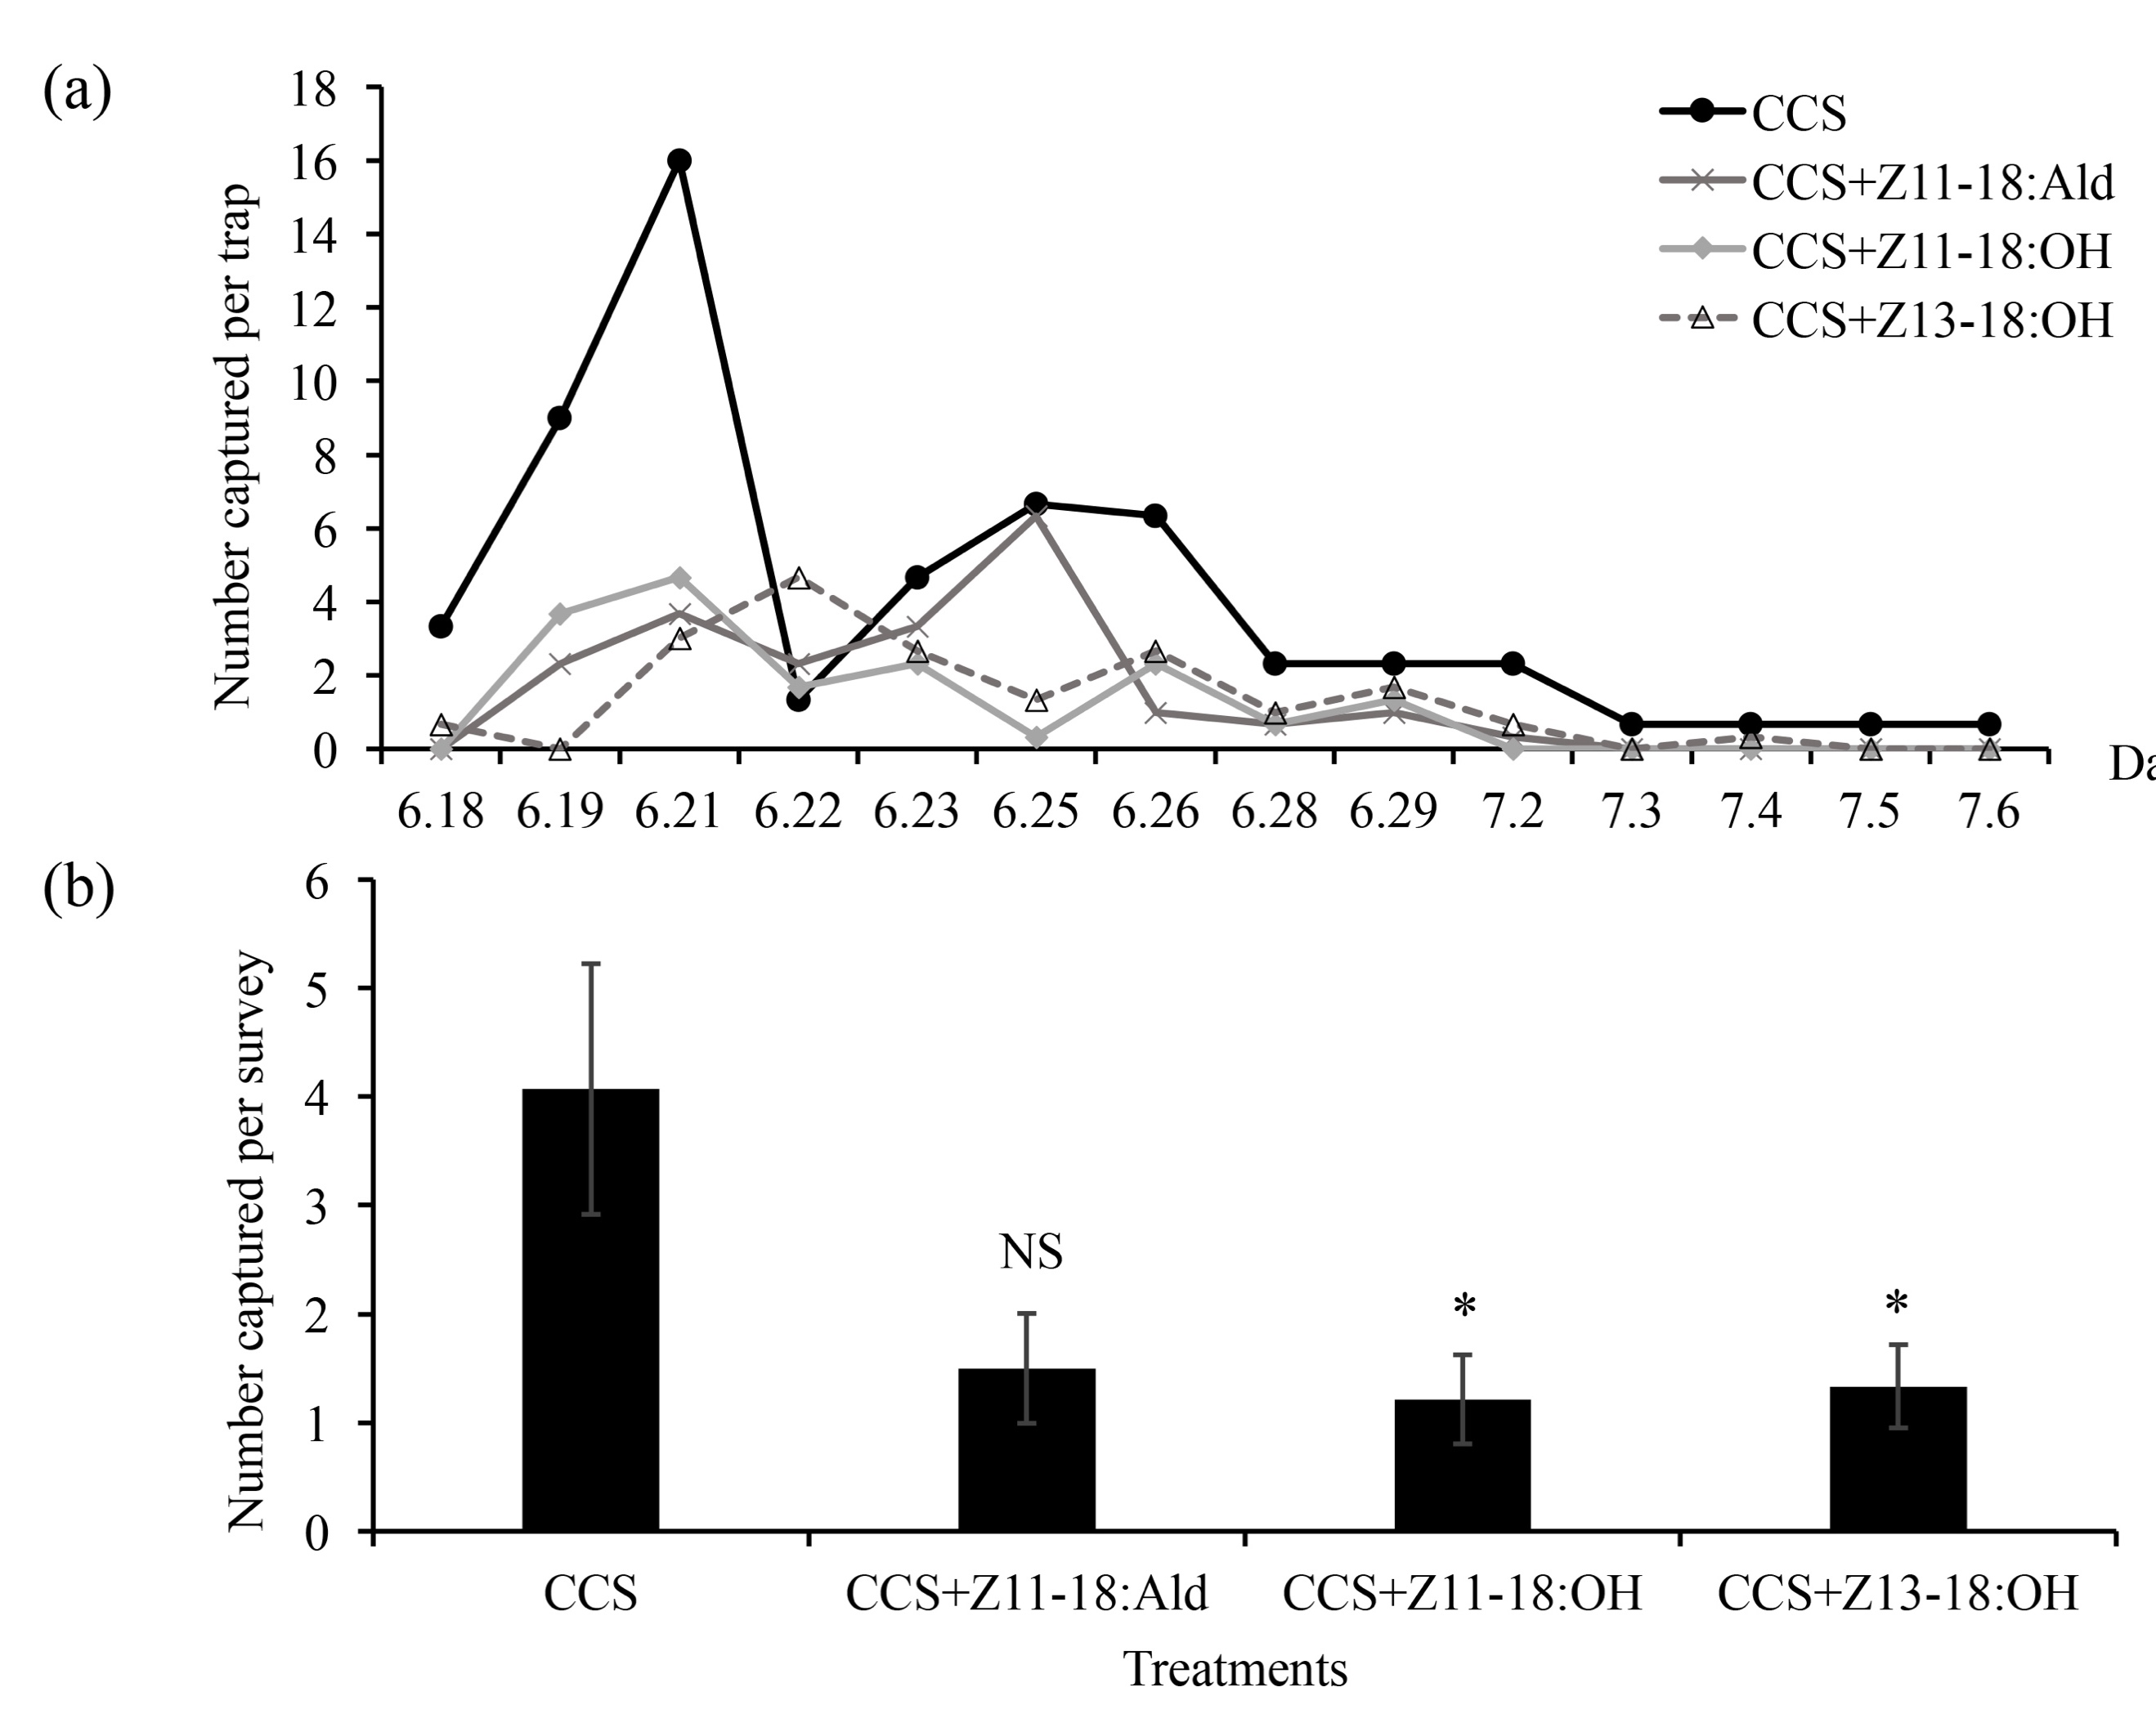


**Fig. 4** The dynamic linear graph (a) and summary graph (b) of number of *C. suppressalis* males captured by commercial *C. suppressalis* sex pheromone alone (CCS) and combined with the components of *C. medinalis* sex pheromone (Z11-18:Ald, Z11-18:OH, Z13-18:OH) in Jiangxi, China, from June to July 2014. The difference of captureof *C. suppressalis* males between treatments and control treatment were analyzed with a *t*-test. *, *P* < 0.05; NS, no significant difference.


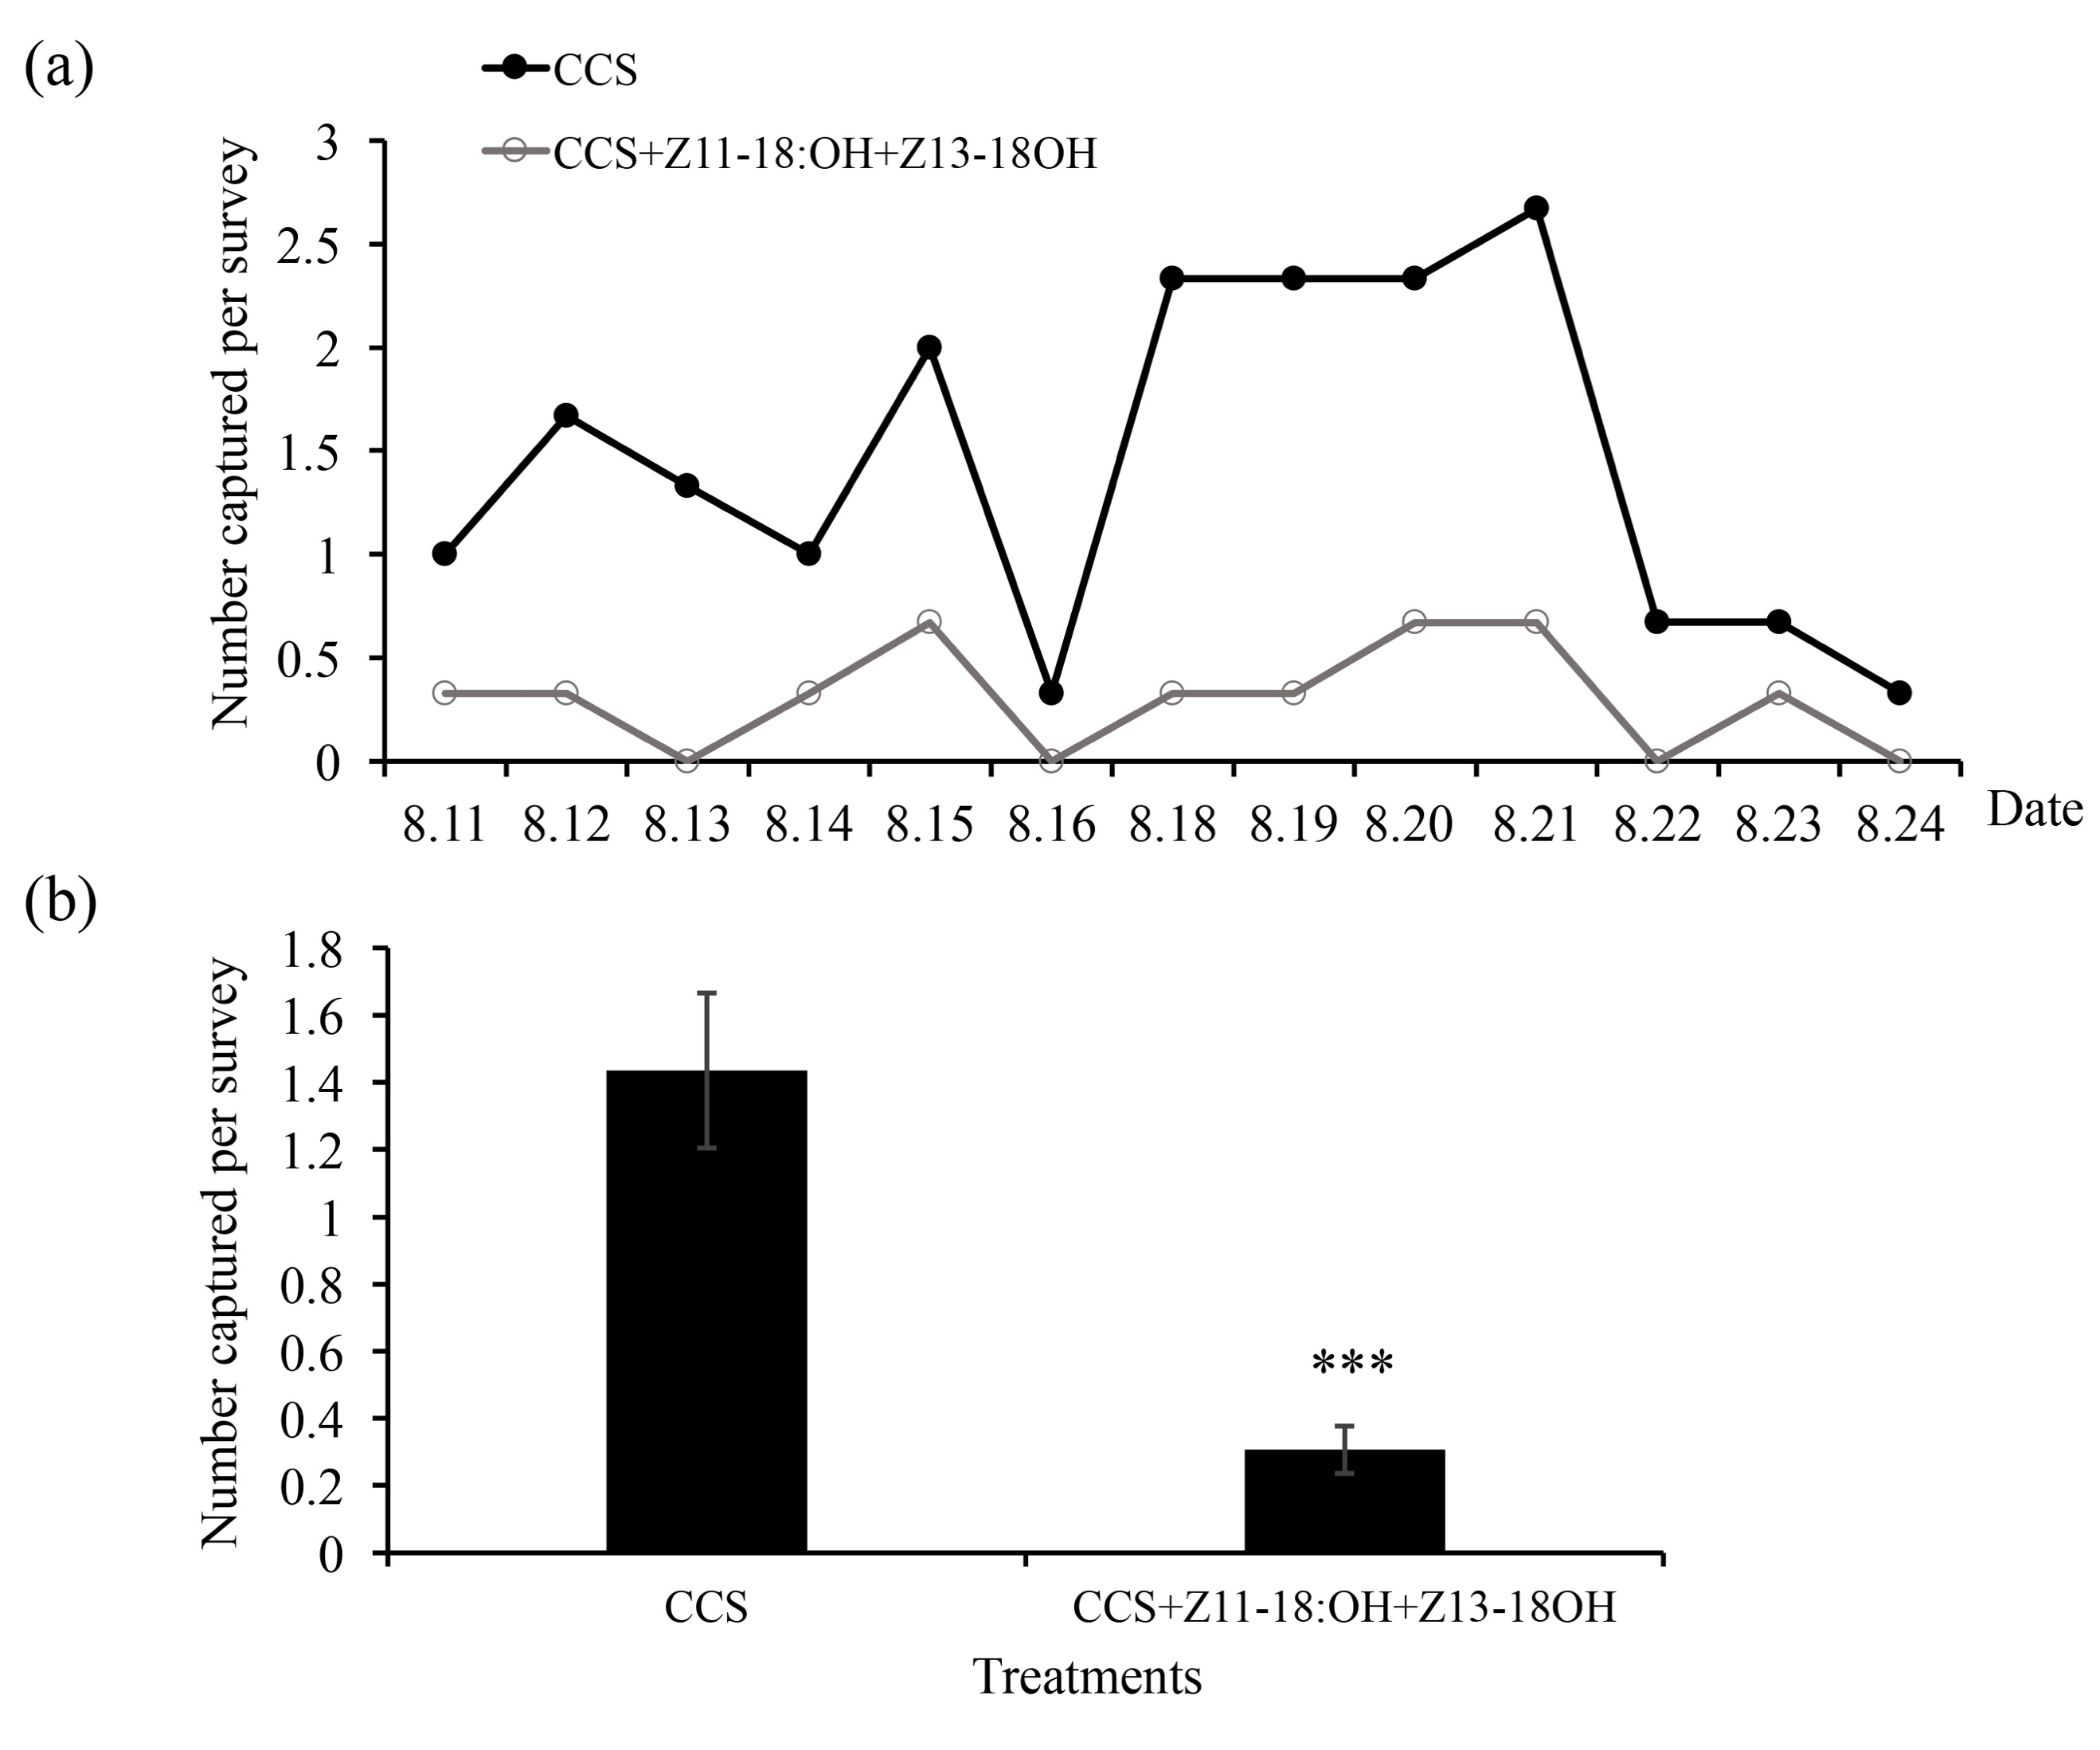


**Fig. 5** The dynamic linear graph (a) and summary graph (b) of number of *C. suppressalis* males captured by commercial *C. suppressalis* sex pheromone alone (CCS) and CCS plus individual components (Z11-18:OH and Z13-18:OH). The difference of captureof *C. suppressalis* males between treatments and control treatment were analyzed with a *t*-test. ***, *P* < 0.001.

Table 1 The experimental design

| **Experiment** | **Experimental purpose** | **Experimental device** | **Time** |
| --- | --- | --- | --- |
| Experiment 1 | To determine whether mixing the sex pheromones of *C. suppressalis* and *C. medinalis* interfere the capture of *C. suppressalis* and *C. medinalis* | Trap 1 | July to September 2012 |
| Experiment 2 | To determine the optimal concentration of CS components in behavioral experiments | Wind tunnel | July to August 2013 |
| Experiment 3 | To determine the response of *C. suppressalis* male to sex pheromone components of *C. medinalis* | Olfactometer | July to August 2013 |
| Experiment 4 | To determine the effects of the sex pheromone components of *C. medinalis* on *C. suppressalis* in the field | Trap 2 | June to August 2014 |

Table 2 The different behavioral responses of *C. suppressalis* males in the wind tunnel to the sex pheromones at different concentrations

| **Treatments** | **Response（%）** | | | |
| --- | --- | --- | --- | --- |
| **Exciting** | **Taking flight** | **Orienting flight** | **Contacting source** |
| CCS | 53.3 ± 5.8a | 36.7 ± 11.5a | 23.3 ± 5.8a | 13.3 ± 5.8a |
| CS (0.1 μg/μl) | 16.7 ± 5.8c | 10.0 ± 0.0b | 6.7 ± 5.8b | 6.7 ± 5.8b |
| CS (1 μg/μl) | 36.7 ± 5.8b | 20.0 ± 0.0b | 10.0 ± 10.0b | 6.7 ± 5.8b |
| CS (10 μg/μl) | 20.0 ± 0.0c | 10.0 ± 10.0b | 0.0 ± 0.0b | 0.0 ± 0.0b |
| CK | 20.0 ± 10.0c | 13.3 ± 5.8b | 0.0 ± 0.0b | 0.0 ± 0.0b |

Data in the table are means ± *SE*, and those in the same column followed by different letters are significantly different (*P* < 0.05, ANOVA followed by Duncan’s new multiple range test). CCS means commercial *C. suppressalis* sex pheromone. CS means the three components of *C. suppressalis* sex pheromone (Z11-16:Ald, Z13-18:Ald, Z9-16:Ald=46:6:5). The control (CK) is redistilled hexane. *N* = 30.
