# Supplementary material for: Mating Disruption of Chilo suppressalis From Sex Pheromone of Another Pyralid Rice Pest Cnaphalocrocis medinalis (Lepidoptera: Pyralidae)
Source: Oxford University Press journal article supplement (doi:10.1093/jisesa/ieaa050), 2020-05-01
Supplement: ieaa050_suppl_supplementary_liang_review_files.zip [file ieaa050_suppl_supplementary_liang_review_files.zip › Liang original version.docx]

# *Targeted journal: Journal of Insect Science*

**Interfering the mating of *Chilo suppressalis* (Walker): A new role of sex pheromones ((Z)-11-Octadecen-1-ol and (Z)-13-Octadecen-1-ol) from *Cnaphalocrocis medinalis* Guenée**

Yu-yong Liang,1,2 Mei Luo,1,3 Xiao-gang Fu,1 Li-xia Zheng,1 Hong-yi Wei1,4

1College of Agronomy, Jiangxi Agricultural University, Nanchang 330045, China

2Institute of Plant Protection, Jiangxi Academy of Agricultural Sciences, Nanchang 330200, China

3 Department of Entomology, Michigan State University, East Lansing, MI 48864, USA

4 Corresponding author. E-mail address: [hywei@jxau.edu.cn](mailto:hywei@jxau.edu.cn) (H-Y Wei)

**Abstract**

The rice stem borer, *Chilo suppressalis* (Walker), and the rice leaf folder,*Cnaphalocrocis medinalis* Guenée are two of the most destructive lepidopteran pests in rice. Since these two lepidopteran insects overlap in their occurrence in rice paddy fields, farmers prefer to set their pheromone-baited trapstogether in rice fields for their monitoring. However, our field observation demonstrated that no male adult of the rice stem borer was captured in traps baited with commercial *C. suppressalis* sex pheromone (CCS) combined with commercial C. medinalis sex pheromone (CCM). To confirm that the *C. medinalis* sex pheromone component(s) interfere with the attraction of males of the rice stem borers to their conspecific female moths, single components of *C. medinalis* sex pheromone combined with CCS in traps were tested in the laboratory and rice paddy field. The results revealed that the two alcohol components in CCM, i.e., (Z)-11-octadecen-1-OH (Z11-18: OH) and (Z)-13-octadecen-1-OH (Z13-18: OH) may cause a significant reduction in the captures by CCS of *C. suppressalis* males. We recommend against using these sex pheromones together in the field and suggest that Z11-18: OH and Z13-18: OH could be potential inhibitors or antagonists of *C. suppressalis* sex pheromone to control the rice stem borer.

**Keywords:** *Chilo suppressalis*, *Cnaphalocrocis medinalis*, sex pheromone, antagonist, interfering **Introduction**

The rice stem borer, *Chilo suppressalis* (Walker) and the rice leaf folder, *Cnaphalocrocis medinalis* Guenée, are two of the most harmful lepidopteran rice pests throughout China and other Asian countries (Su et al. 2014, Luo et al. 2019). In China, these two pests caused wide and extensive damages in rice and led to great economic loss in recent decades (Sheng et al. 2003, Liu et al. 2008). Currently, chemical control, such as application of insecticides has been utilized as an efficient method to control these two pests in China (Huang et al. 2011, Zheng et al. 2011). However, the overuse of insecticides may cause severe insecticide resistance and serious environmental problems (Chen and Klein 2012, Fu et al. 2018, Pu et al. 2019). Therefore, biological control has been recommended as one of the most important strategies to suppress the outbreaks of these rice pests (Lou et al. 2014).

Sex pheromone application is becoming a valuable and efficient strategy of biological control to suppress lepidopteran pests (Chen et al. 2014). For example, pheromone-baited traps have been widely used in male flight monitoring, population forecasting, mass trapping, and mating disruption to monitor and control a lot of lepidopteran pest species (Campion and Nesbitt 1983, Witzgall et al. 2010, Chen et al. 2014). Compared to conventional methods, the pheromone-based control methods have the advantage of pheromones being species-specific. they have high biological activities which means that only relatively small amounts are required, and also have negligible toxic effects on plants and animals (Campion and Nesbitt 1983). Pheromones generally consist of various components, which may be isomers with respect to the geometry and position of the unsaturation or they may be structurally-related compounds differing in chain length or the nature of the functional group. In most cases, the components are secreted in a very precise ratio (Campion and Nesbitt 1983).

In most lepidopteran insects, sex pheromones are generally secreted by the females for attracting the males for copulation (Raina 1989). The *C. suppressalis* sex pheromone was first identified by Nesbitt et al. (1975) as a two-component blend of (Z)-11-hexadecenal (Z11-16:Ald) and (Z)-13-octadecenal (Z13-18:Ald). In 1983, an additional compound, (Z)-9-hexadecenal (Z9-16:Ald), was identified (Tatsuki et al. 1983). These three-component blends (Z11-16:Ald, Z13-18:Ald, and Z9-16:Ald) were found to be in a ratio of 48:6:5, which was used in the production of the standard lure of *C. suppressalis* (Tatsuki 1990, Cork 2004). The *C. medinalis* sex pheromone consisted of four components, (Z)-11-octadecenal (Z11-18:Ald), (Z)-13-octadecenal (Z13-18:Ald), (Z)-11-octadecen-1-ol (Z11-18:OH) and (Z)-13-octadecen-1-ol (Z13-18:OH) in a ratio of 11:100:24:36 (Kawazu et al. 2000). Since then, the sex pheromones of *C. suppressalis* and *C. medinalis* have been widely applied in rice paddy fields and have become an important part of integrated pest management (IPM) programs (Kawazu et al. 2004, Kawazu et al. 2005, Byers 2007, Litsinger 2009, Cho et al. 2013, Chen et al. 2014).

*Chilo suppressalis* has four generations per year in most parts of Jiangxi province, China. In addition, the emergence periods of *C. suppressalis* and *C. medinalis* overlap extensively. For this reason, the two sex pheromones of the two species may be used at the same time by farmers to control both pests. However, previous studies have reported that mixing sex pheromones of two pest species resulted in the interference of captures (Haynes et al. 2002, Gemeno et al. 2006). In this regard, whether the mixing of the sex pheromones of *C. suppressalis* and *C. medinalis* can interfere with captures is currently unknown. Therefore, in this study, we aimed to determine whether mixing the sex pheromones of *C. suppressalis* and *C. medinalis* has negative effects in the IPM of these two pests. We also wanted to determine the underlying mechanism of these negative effects on pest control from the mixing of the two sex pheromones. This study is very important for guiding farmers in the intensive application of various sex pheromones for pest control.

**Materials and Methods**

**Insects**

A laboratory colonized population of *C. suppressalis* was collected from Shanggao county, Jiangxi province, eastern China (E115°04′53.34″, N28°19′10.87″). Naturally overwintering larvae were collected from paddy fields in late March 2012 and then successively reared in cylindrical glass jars (10.0 cm in height and 12.0 cm in diameter) with several rice stems. The jars were plugged with cotton to prevent insects from escaping. The rice stems were changed every two days. Pupae were collected and transferred to 24-well plates for individual emergence. Newly emerged female and male adults were maintained separately in transparent plastic bags with a 10% sucrose solution. The insects were maintained in a growth room under a 14:10 (L: D) photo regime at 25 ± 1℃ and 85 ± 5% RH.

**Chemicals**

Commercial sex pheromones of *C. suppressalis* (CCS) and *C. medinalis* (CCM) were purchased from Pherobio Technology Co., Ltd (Beijing, China). The synthetic chemicals Z11-16:Ald, Z13-18:Ald, Z9-16:Ald, Z11-18:Ald, Z11-18:OH and Z13-18:OH with more than 99% purity were obtained from Sigma® Chemical Co. (St. Louis, MO, U.S.A.).

**Experimental devices**

The trap 1 (Fig. 1a) was custom-made, and it consisted of a basin (diameter: 25.0 cm and depth: 10.0 cm) and a triangular bracket. Two drainage holes were made 6.0-7.0 cm away from the dish bottom. The basin was fixed on the bracket, and the height of the basin was always adjusted to 10.0-20.0 cm higher than the rice plant. 2.0 g washing powder was added to the water in the basin. Subsequently, the basin was filled with water until its level reached the drainage holes. The lures were always fixed 0.5-1.0 cm above the water.

The trap 2 (Fig. 1b) was purchased from Pherobio Technology Co., Ltd (Beijing, China), which consisted of a ship-type trap and a trestle. The ship-type trap consisted of a sticky board, a bezel and a jack device (four holes) for lures.

The olfactometer (Fig. 1c) was custom-made, and it consisted of a cuboid reaction section of 60.0 cm long by 15.0 cm inner diameters. The cuboid was averagely divided into three parts, an insect-releasing region in the middle and two testing regions at the two ends, respectively. Filter papers were placed in each of these regions. An exit opening was made on the back of the device. The olfactometer was kept on a table. Humidified and purified air were pumped into the device at 1.0 L/min from both ends respectively. The lures were made of strips of filter paper (1.0 cm × 5.0 cm), which were loaded with either 100 μl of the test stimulus, or redistilled hexane (control).

**Experimental design**

To determine whether mixing the sex pheromones of *C. suppressalis* and *C. medinalis* interferes with the capture of *C. suppressalis* and *C. medinalis*, we recorded the attraction of the traps baited with CCS and CCM to these two pests in the field (Experiment 1) (Table 1). The traps (trap 1) contained either the two sex pheromones or CCS only as the control. Three traps were set up to serve as replicates of each of the treatments. The test was conducted from July to September 2012 and trap captures were counted every day.

To screen the optimal concentration of CS (three components of *C. suppressalis* sex pheromone (Z11-16:Ald, Z13-18:Ald, Z9-16:Ald = 46:6:5) in behavioral experiments, we tested responses of *C. suppressalis* males in a wind tunnel to its sex pheromones at different concentrations (Experiment 2) (Table 1). The wind tunnel was a cylindrical (2.0 m in length and 0.5 m in diameter) aluminum frame with glass walls. The experimental operation of the wind tunnel was the same as in our other study (Luo et al. 2020). The pheromone source with different concentrations (0.1, 1.0, 10.0 μg/μl) of CS were placed in a 4.0 cm2 mesh cage and were placed 20.0 cm from the upper air outlet of the wind tunnel. One-day-old male adults were placed in a steel screen platform which was placed above the floor of the wind tunnel. Thirty males were tested for each treatment and each male was tested only once. After release, male behavior was observed for 2.0 min. Behaviors recorded included excitation taking flight from the release cage, oriented flight and contacting the pheromone source.

To test the response of male *C. suppressalis* to sex pheromone components of *C. medinalis*, we conducted a two-way choice bioassay on male *C. suppressalis* todifferent sex pheromone components of *C. medinalis* using a custom-made olfactometer (Experiment 3) (Table 1). For each bioassay, the males were introduced individually into the insect-releasing region of the device. The males were released after the barriers (two filter papers) were pulled out. When the male initiated flight and migrated to one of the testing ends (set over half of the choice chambers), the choice was recorded after it remained for at least 60.0 s in that testing end. If the male did not make a choice within 5.0 min after being released into the olfactometer, it was considered as a non-responder. We rotated the olfactometer 180° to randomize any positional effects after five males have been tested. We cleaned the olfactometer with 95% ethyl alcohol after ten males have been tested. The test filter papers which contained different sex pheromone components were used as lures in this study. The lures were CCM; CCM+CCS; Z11-18:Ald; Z13-18:OH; Z11-18:OH; four-component blend of CCM, at a ratio of 100:36:11:24, of the Z13-18:Ald, Z13-18:OH, Z11-18:Ald and Z11-18:OH (CM); the components of CCS and CCM, at a ratio of 140:117:15:36:11:24, of the Z11-16:Ald, Z13-18:Ald, Z9-16:Ald, Z13-18:OH, Z11-18:Ald, Z11-18:OH (CS+CM). Thirty males were tested in each treatment.

To examine the effects of the sex pheromone components of *C. medinalis* on *C. suppressalis* in the paddy field, we observed the attraction of male *C. suppressalis* to the traps baited with a combination of CCS and the components of CCM by the trap 2 (Experiment 4) (Table 1). The treatments were a combination of Z11-18:Ald, Z13-18:OH and Z11-18:OH with CCS respectively and the control was CCS only. Three traps were set up to serve as replicates of each of the treatments. The test was conducted from June to August 2014 and trap captures were also counted every day.

**Data analysis**

We compared the difference of *C. suppressalis* male captures between treatments and control with a *t*-test using SPSS 24.0 (SPSS Inc., Chicago, IL). Differences in olfactometer experiments were analyzed by a *Chi*-square test. The percentage data were arcsine-square-root transformed and statistically evaluated by one-way ANOVA followed by Duncan's new multiple range test. Significance level was set at 0.05.

**Results**

**Mixing the sex pheromones of *C. suppressalis* and *C. medinalis* interfered with the capture of *C. suppressalis***

During the experimental period (July to September 2012), we found that no *C. suppressalis* male and ten *C. medinalis* males were caught in the traps baited with the combined CCS andCCM. However, the total captures bytraps baited with CCS only were 254 and the average trap was 2.41 males per trap per day, which were extremely significantly higher than those captured by the traps baited with the combined CCS and CCM (*t* (76) = 6.045, *P* < 0.001) (Fig. 2). The lowest capture of male *C. suppressalis* by its sex pheromone (CCS) was recorded on August 29th, 2012. These results suggested that mixing the sex pheromones of *C. suppressalis* and *C. medinalis* interfered with the capture of *C. suppressalis* in the field.

**Z11-18:OH and Z13-18:OH are two major components of CCM that inhibited the attraction of male *C. suppressalis* in olfactory behavior**

To explore the optimal concentration of the CS components which influenced behavior, we tested the response of *C. suppressalis* males to CCS and three concentrations of CS (Z11-16Ald: Z13-18Ald: Z9-16Ald = 140:17:15) in the wind tunnel experiment (Table 2). The results showed that the CCS elicited the highest percentage of *C. suppressalis* males’ excitation, taking flight, orienting flight and contacting source among the five treatments. Among the three concentrations of the three components (Z11-16Ald: Z13-18Ald: Z9-16Ald = 140:17:15) of CS, *C. suppressalis* males showed high levels of excitation, taking flight, orienting flight and contacting source to the concentration of 1.0 μg/μl. There was no observed difference in the four behaviors to the concentrations of 0.1, 10.0 μg/μl and control. Therefore, 1.0 μg/μl was used as the optimal concentration of CS in further behavioral experiments.

To probe the response of *C. suppressalis* male to sex pheromone components of *C. medinalis*, we tested the attractiveness of the seven lures to *C. suppressalis* males using a custom-made olfactometer (Fig. 3). We found that the lures of Z11-18:Ald (*χ2 =* 1.067, *P* = 0.302), Z13-18:OH (*χ2 =* 1.067, *P* = 0.302) and CCS+CCM (*χ2 =* 1.067, *P* = 0.302) had no significant effects on responses of *C. suppressalis* males. However, the males were predominantly attracted to the control than to Z11-18:OH (*χ2 =* 32.267, *P* < 0.001), CM (*χ2 =* 17.067, *P* < 0.001), CS+CM (*χ2 =* 38.400, *P* < 0.001) and CCM (*χ2 =* 13.067, *P* < 0.001) treatments. The results suggested that Z11-18:OH was the major component of *C. medinalis* to inhibit responses of *C. suppressalis* males.

**Adding Z11-18:OH and Z13-18:OH to the CCS significantly decreased the captures of *C. suppressalis* males in the field experiment**

We examined the inhibition effects of the sex pheromone components of *C. medinalis* on the response of *C. suppressalis* males in the field. The results showed that adding Z11-18:OH (*t* (26) = 2.334, *P* < 0.05) or Z13-18:OH (*t* (26) = 2.252, *P* < 0.05) to the CCS inhibited the capture of *C. suppressalis* males in the field (Fig. 4). However, compared with control treatment (CCS), adding Z11-18:OH (*t* (26) = 2.042, *P* = 0.051) had no significant effect on *C. suppressalis* male captures. This suggested that adding Z11-18:OH or Z13-18:OH to the CCS could significantly inhibit the attraction of CCS to *C. suppressalis* males in the field.

Furthermore, we investigated the response of *C. suppressalis* males to the combination of Z11-18:OH, Z13-18:OH and CCS. We also found that adding both Z11-18:OH and Z13-18:OH (*t* (24) = 4.677, *P* < 0.001) to the CCS could significantly inhibit the attraction of CCS to *C. suppressalis* males in the field (Fig. 5). The means of total captures by CCS without and with both Z11-18:OH and Z13-18:OH were 18.66 and 2.33, respectively.

**Discussion**

In this study, we found that mixing the sex pheromones of *C. suppressalis* and *C. medinalis* interfered with the capture of *C. suppressalis* males in field experiments. Our finding agreed with the result of Gemeno et al. (2006), which showed that mixing sex pheromones of two insect species resulted in significantly lower captures of one of the species. Similarly, attraction of *Tetanolita mynesalis* (Lepidoptera: Noctuidae) to its own pheromone was inhibited when mixed with the sex pheromone of *Lacinipolia renigera* (Lepidoptera: Noctuidae) (Haynes et al. 2002) and the sex pheromone of *Adoxophyes orana* (Lepidoptera: Corynidae) inhibited the attraction of *Cydia pomonella* (Lepidoptera: Tortricidae) (Potting et al. 1999). Such phenomena of inhibition or antagonism in the sex pheromone systems of several insect species probably contribute to the reproductive isolation of closely related species (same genus) (Roelofs and Cardé 1974, Borden 1997, Cardé and Haynes 2004). In addition, pheromone inhibition or antagonism may occur between species that are not closely related (different genera). For instance, Lopez et al. (1990) found that multispecies sex pheromone traps caused a reduction of baiting in more than one species compared to the baiting in individual species traps. Our results demonstrated that CCM inhibited the attraction of *C. suppressalis*. Therefore, we do not recommend the use of these two sex pheromones together in the field.

Sex pheromones in many insect species are composed of multiple components. The permeation of an individual component in the air can often disrupt the sexual communication between male adult and female adult. Our olfactory experiments and field tests showed that adding Z11-18:OH and Z13-18:OH to the traps baited with CCS caused antagonism in the attraction of *C. suppressalis* males. The results are similar to the studies done on the yellow stem borer *Scirpophaga incertulas* (Lepidoptera: Pyralidae), which showed that Z-11-hexadecenol from *S. incertulas* sex pheromone inhibited the captures of *C. suppressalis* males (Cork and Basu 1996). Some alcohols have been shown to be either synergists or inhibitors of many insect pheromones. Yu et al. (2014) reported that 1-undecanol acted as sex pheromone synergist to enhance the attraction of male *Grapholita molesta* (Lepidoptera: Tortricidae) pheromone traps. A previous study demonstrated that Z-11-hexadecenol inhibited the attraction of male *Mamestra brassicae* (Lepidoptera: Noctuidae)(Struble et al. 1980). Likewise, the attraction of *Cydia pomonella* (Lepidoptera: Tortricidae) was inhibited by Z-9-tetradecenol (Chisholm et al. 1983). Our results indicated that the alcohols Z11-18:OH and Z13-18:OH may act as inhibitors of the *C. suppressalis* sex pheromone.

We found that the combined usage of CCS and CCM in traps caused no capture of *C. suppressalis* males in field experiments. Our results also demonstrated that Z11-18:OH and Z13-18:OH could improve the efficiency of mating disruption by inhibiting the attraction of *C. suppressalis* males to CCS. In practice, approximate 6.64 million hm2 rice were damaged by herbivore arthropod pests in Jiangxi province in China, which scale was covered 66.84% for entirely damaged scale of crop lands during the years from 2010 to 2016 (Zhong et al. 2019). Currently, application of sex pheromone mating disruption techniques has become one of the most important methods to control lepidopteran pests in rice. Xu et al., (2019) tested the control effects of sex pheromone on *C. suppressalis* and *C. medinalis* in Taihe county, Jiangxi province. The results showed that sex pheromone may efficaciously suppress the occurrence and damage of the two rice pests. In Yugan, Fengcheng, Shanggao, Jishui and other counties, the sex pheromone management effects on *C. suppressalis* and *C. medinalis* were significant, reaching 60% and 40% respectively (Zhong et al. 2019). In order to reduce the labor cost and the number of traps, the combination of the two traps has been popularly used to trap pests colonizing in same niche (Zhou et al.2012, Zhu et al.2015). However, mixed usage of the different insect sex pheromones will bring the loss of trapping and even repellent effect on target insects, which would cause great hidden dangers to the outbreak of these target insects according to our results.

In summary, our research results are important to the guidance of agricultural production for the mixed use of sex pheromones of two major rice pests and play an increasingly important role in Integrated pest management (IPM). Thus, we do not suggest the usage of sex pheromones of these two species together in the field. In addition, we also suggest that Z11-18:OH and Z13-18:OH could be potential repellents or antagonists of *C. suppressalis* sex pheromone, which may contribute to biological control in sex pheromone-mediated mating disruption in future.

**Acknowledgments**

The authors are grateful to Zhiwen Yao for assistance in arthropod sampling. We would like to thank DBM editing for professional English language editing services. The financial support for this research was granted by the National Key Research and Development Program of China (Project No. 2017YFD0301604, 2016YFD0200808 and 2017YFD0200400). M.L. acknowledges the support from the China Scholarship Council (CSC) (File No. 201708360095).

**References**

**Borden, J. H. 1997.** Disruption of semiochemical-mediated aggregation in bark beetles, pp. 421-438, Insect Pheromone Research. Springer.

**Byers, J. A. 2007.** Simulation of mating disruption and mass trapping with competitive attraction and camouflage. Environ. Entomol. 36: 1328-1338.

**Campion, D., and B. F. Nesbitt. 1983.** The utilisation of sex pheromones for the control of stem-borers. Int. J. Trop. Insect Sci. 4: 191-197.

**Cardé, R. T., and Haynes，K. F. 2004.** Structure of the pheromone communication channel in moths. Advances in insect chemical ecology. Cambridge University Press, Cambridge, pp. 283–332

**Chen, R.-z., and M. G. Klein. 2012.** Efficacy of insecticides against the Rice Stem-borer, *Chilo suppressalis* (Walker) (Lepidoptera: Crambidae), and use of sex pheromones to time accurately the yearly application. Int. J. Pest Manage. 58: 354-360.

**Chen, R.-Z., M. G. Klein, C.-F. Sheng, Q.-Y. Li, Y. Li, L.-B. Li, and X. Hung. 2014.** Mating disruption or mass trapping, compared with chemical insecticides, for suppression of *Chilo suppressalis* (Lepidoptera: Crambidae) in Northeastern China. J. Econ. Entomol. 107: 1828-1838.

**Chisholm, M., W. Steck, E. Underhill, and P. Palaniswamy. 1983.** Field trapping of diamondback mothPlutella xylostella using an improved four-component sex attractant blend. J. Chem. Ecol. 9: 113-118.

**Cho, J. R., K. San Choi, H. H. Park, S. Lee, K. H. Yum, J. K. Jung, B. Y. Seo, and M. Lee. 2013.** Electroantennogram and field responses of Korean population of the rice leaf folder, *Cnaphalocrocis medinalis* (Lepidoptera: Crambidae), to sex attractant candidates. J. Asia-Pacif. Entomol. 16: 61-66.

**Cork, A. 2004.** Pheromone manual. Natural Resources Institute, Chatham maritime ME4 4TB, UK.

**Cork, A., and S. Basu. 1996.** Control of the yellow stem borer, *Scirpophaga incertulas* by mating disruption with a PVC resin formulation of the sex pheromone of *Chilo suppressalis* (Lepidoptera: Pyralidae) in India. Bull. Entomol. Res. 86: 1-9.

**Fu, B., Q. Li, H. Qiu, L. Tang, D. Zeng, K. Liu, and Y. Gao. 2018.** Resistance development, stability, cross‐resistance potential, biological fitness and biochemical mechanisms of spinetoram resistance in *Thrips hawaiiensis* (Thysanoptera: Thripidae). Pest Manage. Sci. 74: 1564-1574.

**Gemeno, C., A. Sans, C. López, R. Albajes, and M. Eizaguirre. 2006.** Pheromone antagonism in the European corn borer moth *Ostrinia nubilalis*. J. Chem. Ecol. 32: 1071-1084.

**Haynes, K., C. Gemeno, K. Yeargan, J. Millar, and K. Johnson. 2002.** Aggressive chemical mimicry of moth pheromones by a bolas spider: how does this specialist predator attract more than one species of prey? Chemoecology 12: 99-105.

**Huang, J., S.-f. WU, and G.-y. YE. 2011.** Evaluation of lethal effects of chlorantraniliprole on Chilo suppressalis and its larval parasitoid, *Cotesia chilonis*. Agr. sci. china.10: 1134-1138.

**Kawazu, K., T. Kamimuro, H. Kamiwada, K. Nagata, T. Matsunaga, H. Sugie, T. Fukumoto, T. Adati, and S. Tatsuki. 2004.** Effective pheromone lures for monitoring the rice leaffolder moth, *Cnaphalocrocis medinalis* (Lepidoptera: Crambidae). Crop Protect. 23: 589-593.

**Kawazu, K., J. I. Hasegawa, H. Honda, Y. Ishikawa, S. Wakamura, H. Sugie, H. Kamiwada, T. Kamimuro, Y. Yoshiyasu, and S. Tatsuki. 2000.** Geographical variation in female sex pheromones of the rice leaffolder moth, *Cnaphalocrocis medinalis*: identification of pheromone components in Japan. Entomol. Exp. Appl. 96: 103-109.

**Kawazu, K., Y. Suzuki, Y. Yoshiyasu, E. B. Castillon, H. Ono, P. T. Vuong, F.-K. Huang, T. Adati, T. Fukumoto, and S. Tatsuki. 2005.** Attraction of *Cnaphalocrocis medinalis* (Lepidoptera: Crambidae) males in Southeast Asia to female sex pheromone traps: Field tests in southernmost China, northern Vietnam and southern Philippines with three synthetic pheromone blends regarding geographic variations. Appl. Entomol. Zool. 40: 483-488.

**Litsinger, J. A. 2009.** When is a rice insect a pest: yield loss and the green revolution, pp. 391-498, Integrated pest management: innovation-development process. Springer.

**Liu, Y., J. Wang, X. Feng, and X. Jiang. 2008.** Analysis on the occurring of *Cnaphalocrocis medinalis* in 2007 and forecasting its occuring trends in 2008. China Plant Protection 28: 33-35.

**Lopez, J., T. Shaver, and J. Goodenough. 1990.** Multispecies trapping of *Helicoverpa (Heliothis) zea*, *Spodoptera frugiperda*, *Pseudaletia unipuncta*, and *Agrotis ipsilon* (Lepidoptera: Noctuidae). J. Chem. Ecol. 16: 3479-3491.

**Lou, Y.-G., G.-R. Zhang, W.-Q. Zhang, Y. Hu, and J. Zhang. 2014.** Reprint of: Biological control of rice insect pests in China. Biol. Control 68: 103-116.

**Luo, M., H.-M. Cao, Y.-Y. Fan, X.-C. Zhou, J.-X. Chen, H. Chung, and H.-Y. Wei. 2020.** Bioaccumulation of cadmium affects development, mating behavior, and fecundity in the Asian Corn Borer, *Ostrinia furnacalis*. Insects 11: 7.

**Luo, M., Z. Wang, B. Yang, L. Zheng, Z. Yao, U. Ahmet Seyrek, H. Chung, and H. Wei. 2019.** Effects of winter cover crops on rice pests, natural enemies, and grain yield in a rice rotation system. J. Insect Sc. 19: 25.

**Nesbitt, B. F., P. Beevor, D. Hall, R. Lester, and V. Dyck. 1975.** Identification of the female sex pheromones of the moth, *Chilo suppressalis*. J. Insect Physiol. 21: 1883-1886.

**Potting, R., P. Lösel, and J. Scherkenbeck. 1999.** Spatial discrimination of pheromones and behavioural antagonists by the tortricid moths *Cydia pomonella* and *Adoxophyes orana*. J. Comp. Physiol. A. 185: 419-425.

**Pu, J., Z. Wang, and H. Chung. 2019.** Climate change and the genetics of insecticide resistance. Pest Manage. Sci.

**Raina, A. K., Jaffe, H., Kempe, T. G., Keim, P., Blancher, R. W., Fales, H. M., ... & Hayes, D. K. 1989.** Identification of a neuropeptide hormone that regulates sex pheromone production in female moths. Science 244: 796-798.

**Roelofs, W. L., and R. T. Cardé. 1974.** Sex pheromones in the reproductive isolation of lepidopterous species. Pheromones: 96-114.

**Sheng, C., H. Wang, S. Sheng, L. Gao, and W. Xuan. 2003.** Pest status and loss assessment of crop damage caused by the rice borers, *Chilo suppressalis* and *Tryporyza incertulas* in China. Entomol. Knowl. 40: 289-294.

**Struble, D., H. Arn, H. Buser, E. Städler, and J. Freuler. 1980.** Identification of 4 sex pheromone components isolated from calling females of *Mamestra brassicae*. Z. Naturforsch. C.35: 45-48.

**Su, J., Z. Zhang, M. Wu, and C. Gao. 2014.** Changes in insecticide resistance of the rice striped stem borer (Lepidoptera: Crambidae). J. Econ. Entomol. 107: 333-341.

**Tatsuki, S. 1990.** Status of application of sex pheromone of rice stem borer moth, *Chilo suppressalis* in Japan. Int. J. Trop. Insect Sci. 11: 807-812.

**Tatsuki, S., M. Kurihara, K. Usui, Y. Ohguchi, K. Uchiumi, K. Arai, S. Yabuki, and F. Tanaka. 1983.** Sex pheromone of the rice stem borer, *Chilo suppressalis* (Walker) (Lepidoptera: Pyralidae): the third component, Z-9-hexadecenal. Appl. Entomol. Zool. 18: 443-446.

**Witzgall, P., P. Kirsch, and A. Cork. 2010.** Sex pheromones and their impact on pest management. J. Chem. Ecol. 36: 80-100.

**Xu, S., M. Xiao, Z. Wei, S. Xu, Y. Xiao, H. Kang. 2019.** Application of sex pheromone copulatory interference technique in rice pest control. China Plant Protection. 39: 48-51.

**Yu, H., J. Feng, Q. Zhang, and H. Xu. 2014.** (Z)-3-hexenyl acetate and 1-undecanol increase male attraction to sex pheromone trap in *Grapholita molesta* (Busck) (Lepidoptera: Tortricidae). Int. J. Pest Manage. 61: 30-35.

**Zheng, X., X. Ren, and J. Su. 2011.** Insecticide susceptibility of *Cnaphalocrocis medinalis* (Lepidoptera: Pyralidae) in China. J. Econ. Entomol. 104: 653-658.

**Zhong, L., N. Guo, W. Shi, J. Shi, S. Cao. 2019.** Integrated optimization and application of pesticide reduction technology in Jiangxi province. China Plant Protection. 39: 84-86, 91.

**Zhou, Y, J Liu, D. Lin, H. Xu, H. Chen, J. Zhang. 2012.** Comparison of the efficacy between sex pheromone of the peach fruit borer (*Carposinasa sakii* Matsumura) and the codling moth (*Laspeyresia pomonella* (L.)) in paddy fields. Journal of Jiangsu Forestry Science ＆Technology. 39: 17-21.

**Zhu, H., J Xu, R. Zhang. 2015.** Mating disrupting and trapping effects of the codling moth sex pheromone on oriental fruit moth, *Grapholita molesta*. Journal of biosafety. 24: 320-326.
