# Supplementary material for: Mating Disruption of Chilo suppressalis From Sex Pheromone of Another Pyralid Rice Pest Cnaphalocrocis medinalis (Lepidoptera: Pyralidae)
Source: Oxford University Press journal article supplement (doi:10.1093/jisesa/ieaa050), 2020-05-01
Supplement: ieaa050_suppl_supplementary_liang_review_files.zip [file ieaa050_suppl_supplementary_liang_review_files.zip › Liang response to reviews.docx]

Dear Dr. Ziesmann,

Many thanks to you and the reviewers for the very helpful comments that greatly improved our manuscript. We were pleased to know that our work was rated as potentially acceptable for publication in Journal of Insect Science, subject to adequate revision. We have received the comments and constructive criticism by both reviewers. In this letter, we provide a detailed, point-by-point responses to all of the reviewers’ comments (in blue). We believe that we have now fully addressed your concerns and that of the two reviewers in preparing a revised manuscript.

Reviewer: 1

Comments to the Author
1) The writing needs improvement. There are several awkward sentences that need to be re-written. I suggest that the authors seek assistance from a professional editing office or from an English-speaking colleague to review the manuscript.

Thank you for your suggestion. This revision has been modified by DBM editing with professional English language editing services before we submit.

2) The authors demonstrate that the pheromonal baits of *C. medinalis* interfere with the captures of males of *C. suppressalis* when the pheromonal baits of the two species are used together in a trap. However, it seems that authors determined a priori that the *C. medinalis* pheromone is the one that inhibits the attraction of the *C. suppressalis* males but not the other way around. Thus, they did not include the *C. medinalis* pheromone alone as a treatment in experiment 1. The results show that only 10 males of *C. medinalis* were captured by traps baited with pheromones of both species, suggesting that the pheromone of *C. suppressalis* also has an effect on the attraction of males of *C. medinalis*. As the manuscript mentions that both species are important rice pests and the study takes an applied approach, then the pheromone *C. medinalis* alone should have been included in experiment 1, otherwise, the story is incomplete.

Thank you for the positive feedback. We have added the data of captured number of *C. medinalis* as Figure 2b with related description in the result section (Please find lines 176-179). We also corrected some errors of data in the manuscript.

The new figure as follows:


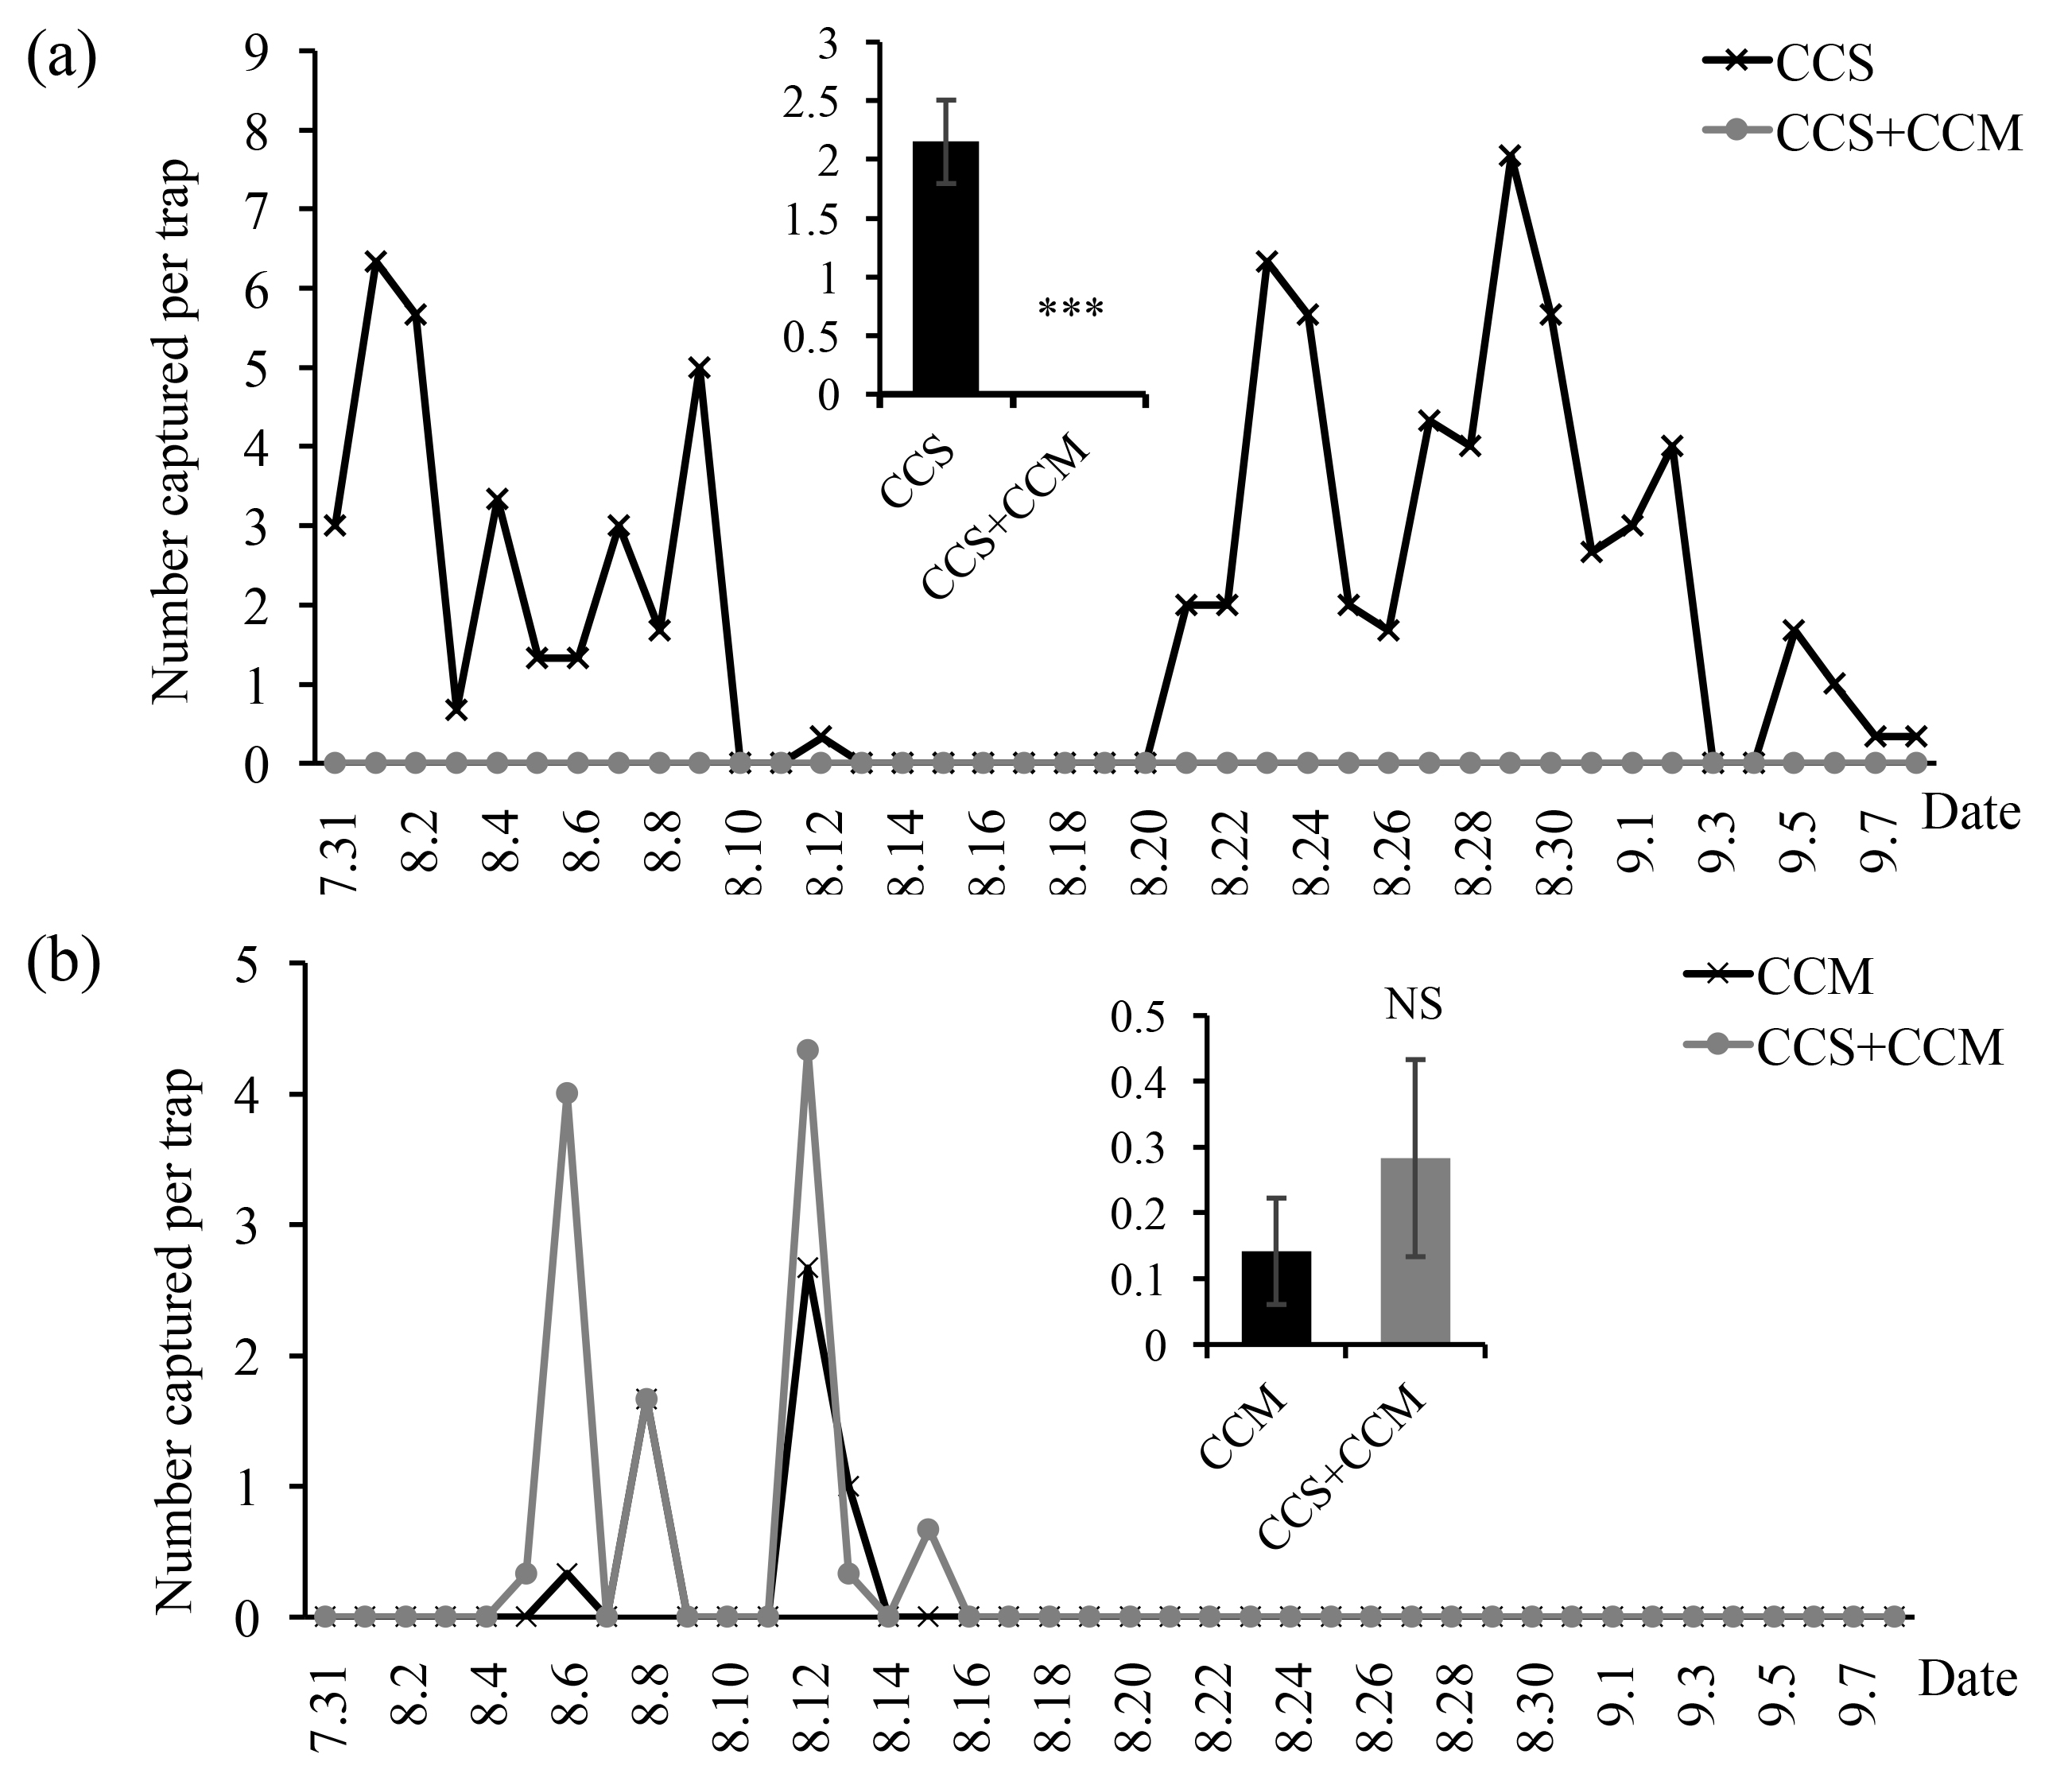


3) I do not think that experiment 2 is needed because it does not contribute to the story, and therefore I would recommend eliminating it. Experiment 3 should have been done in a wind tunnel and not in the olfactometer used because the moths are strong-flying insects. Anyway, the authors should explain why they used two types of olfactometers and traps for their experiments. Experiments 4 and 5 should have been performed in only one experiment adding the compounds single, the binary blends or the tertiary blend of the pheromone compounds of *C. medinalis* to the *C. suppressalis* pheromone.

Thank you for your comments. We agree with your suggestion and removed experiment 2 and Table 2 in the manuscript. We added the information of optimal concentration of CS components in Method (100-106).

We have added more details to explain why we used olfactometers in the Method (121-122).

We listed 4 experiments in the manuscript. What is experiment 5? The experiment in the Fig. 5?

**Specific comments:**

Introduction
The authors could provide more details about the natural history of both moth species. For instance, if both are native from China, their distribution and host plants. This is important to understand why pheromone of *C. medinalis* inhibits the attraction of *C. suppressalis* males, and possibly vice versa.

Thank you for your suggestion. We have added more details in the introduction according to your suggestion (line 34-36).

Lines 42-43, to my knowledge semiochemicals are not biological control agents.

Thank you for your question. We have changed “biological control” to “biotechlogical control” according to the second reviewer’ suggestion.

Line 48, I am not sure I understand the sentence “they have high biological activities”

We have rewritten this sentence. “Compared to conventional methods, the pheromone-based control methods have the advantages of species-specific and strong bioactivities, which leads to small amounts are required and negligible toxic effects on plants and non-target animals”.

Lines 50-53, I suggest deleting this paragraph as it does not contribute much to the story.

Done

Line 74, the authors should provide a research question or hypothesis.

Done

Methodology

Line 82, I am not sure I understand the sentence “A laboratory colonized population of *C. suppressalis* was collected from..”

We have changed this sentence to “The *C. suppressalis* laboratory colony was collected from…”

Line 84, how was reared the larvae? Individually?

20-30 *C. suppressalis* individuals were reared per jar (line 85-86)

Line 89, please specify the size of bags

Done

Line 100, how much water was added to traps?

Two drainage holes were made 6.0-7.0 cm away from the dish bottom, and the basin was filled with water until its level hanged the drainage holes.

Line 106, what does cubic reaction mean?

The olfactometer consisted of a cuboid as experiment section (60.0 cm length, 15.0 cm width and 15.0 cm height).

Line 118, 153, I consider that 3 replicates are not enough for the field trials because in my experience there is much variation in the males' catches

Three replicates in each treatment in the field trials could meet the basic requirements for a statistical significance test. Of course, more replicates resulted in the observation closer to the reality. However, more replicates require a larger scale of similar cultivation conditions for rice plants and similar population densities for both *C. suppressalis* and *C. medinalis*, which cannot be satisfied by every field trial.

Lines 157-161, in my opinion, the field tests should be analyzed with a GLM. A GLM would also have the advantage that multiple combinations of testing can be included in one GLM. Now each combination is tested separately, thereby increasing the chance of finding something significant. The authors also mention that data were analyzed by ANOVA and Duncan test but I cannot find these analyses in results.
We modified descriptions about the statistical analysis. In addition, we suggest that GLM is not suitable for the field trials, which were carried out in different seasons, and were affected by the different weather conditions.
Results and Discussion sections should be improved.
Done
Fig. 2 can be deleted (captures by dates). Simply report means and error or deviation standards for the number of *C. suppressalis* captured by traps baited with sex pheromone alone or combined with the pheromone of *C. medinalis* in the text.
Also, I do not think Figs 4a and 5a are needed. This is not the focus of the paper.
We kept Fig.2 (captures by dates), Fig. 4a and 5a since it reflected the population dynamics of both *C. suppressalis* and *C. medinalis* in the rice fields, which may provide a reference for researchers focused on the related topics.

Fig. 3, what does the response mean? Please specify.

Done

Reviewer: 2

Comments to the Author
The present work deals with experiments on the suitability of the combined use of the sex pheromones of two lepidopterans, *Chilo suppressalis* and *Cnaphalocrocis medinalis*. Given that these two insects coincide in the paddy fields, the combined use of their pheromones in monitoring traps may be convenient for the growers to reduce trap and hand labor costs. However, there are many examples of communication interferences, in which the presence of other pheromone blend in the same trap inhibits the captures of one or both of the species. As a consequence, it is worth confirming if this is the case of *C. suppressalis* when its pheromone (CCS) is combined with *C. medinalis* pheromone (CCM) in the same trap. For this purpose, authors performed field trials and behavioral laboratory assays to check the effect on male CS attraction of the combination of commercial lures, and also with the individual *C. medinalis* pheromone components.
The manuscript is well written in general. Experiments are well designed but some experimental details are missing. Conclusions are supported by the results. However, my first concern is in the title: “Interfering the mating of *Chilo suppressalis* (Walker): A new role…”. I think it does not fit the conclusions drawn from the experiments. Authors prove that male *C. suppressalis* attraction to the traps is interfered with (Z)-11-Octadecen-1-ol and (Z)-13-Octadecen-1-ol, but their potential effect as mating inhibitors is not specifically demonstrated in the present work. I suggest changing the title

Thank you for your comments which greatly improved our manuscript. We have addressed your comments and we have changed the title to “Mating disruption of *Chilo suppressalis* (Walker) from sex pheromone of another pyralid rice pest *Cnaphalocrocis medinalis* Guenée”.

There are a few sentences and spelling mistakes that need revision throughout the text and I also suggest considering the following points.

Thank you for your point. We have addressed your comments and this revision has been modified by DBM editing with professional English language editing services before we submit.

- In general, lures need to be better described: CCS and CCM are commercial pheromone dispensers (line 92)? Which kind? Rubber septa? Vials? or are they pure chemical blends that you formulate in dispensers or employ to impregnate materials? Which load? Any idea of their release rate? You should describe this in the appropriate section. Same with how you provide the compounds in the wind tunnel assays (line 127)… filter paper as in the olfactometer? Please add this information. And the same in the field trial with trap 2 (line 152).

Thank you for your comments. We added the information of lures in Method (line 92-105)

- line 18-19: please *C. medinalis* in italics

Done
- line 23: please change OH with ol in the complete names of the substances ((Z)-11-octadecen-1-ol and (Z)-13-octadecen-1-ol)

Done
- lines 32 and 33: please insert taxonomic classification for both species (Order: Family)

Done
- line 37: please add examples of active ingredients employed

Done
- line 42: when talking about pheromones I suggest employing “biotechnological control” instead of “biological control”.

Done
- line 45: please delete “monitor and” because “flight monitoring” is already mentioned

Done
- line 48: please correct capital letter “They”

Done
- line 58: please delete “blends” and rewrite: “These three components (…) were found to be…”

Done. We changed this sentence to “The ratio of these three-components (Z11-16:Ald, Z13-18:Ald, and Z9-16:Ald) in *C. suppressalis* is 48:6:5…”
- line 74: “is currently known”, can this be cited? Or is it just popular knowledge?

It is “currently unknown” in the manuscript and we have changed it to “which have not been investigated yet”.

- line 76: I suggest changing to “has negative effects in the IPM of *C. suppressalis*”. I think it is not appropriate to talk about “these two pests” because the authors are not investigating if the combination of the pheromones affects *C. medinalis* attraction but only the effect on *C. suppressalis*. In this regarding, if you have any clue about the opposite effect (interfering *C. medinalis* attraction with *C. suppressalis* pheromone), I suggest including a comment.

Thank you for your comments. We investigated the effect of combination of the sex pheromones of *C. suppressalis* and *C. medinalis* on *C. medinalis* attraction and added the result in Fig. 1b according to the first reviewer’ comment.
- line 82: I would just say “Laboratory population” or “Laboratory colony”

We have changed it to “laboratory colony”
- line 92: as commented above, do you have any information about the composition of the “Commercial sex pheromones”? Which compounds and composition? Are they mixtures of the active ingredients or are they formulated in dispensers such as rubber septa? which load or concentration? These details are essential to be added.

Thank you for your comments. We have added more details about lures in the Method-Chemicals (line 92-105).
- line 100: I guess it is for preventing the escapes but please specify why you add the washing powder.

Done
- line 103: why did you change trap design in the last experiment? Is there any special motivation? You could include a brief comment here or elsewhere in the manuscript.

Thank you for your comments. In 2012, we used a simple trap (trap 1) in the field experiment, which was generally used by local famers (line 107-108). In 2014, with the industrialization and promotion of traps, we choose a kind of more convenient trap, trap 2 (line 115-116).
- line 106: “cuboid reaction section” is not much clarifying for me… is it a cage? a box? Which material? Plexiglass? Glass?

The olfactometer included a transparent plastic cuboid box as an experiment section (121-122).
- line 110: how was air purified? Activated carbon filters or is it coming from a purified air generator? Please specify.

Done
- line 117: CCS and CCM are formulated in dispensers? please describe the lures somewhere, here or when you describe the chemicals.

We have added more details of CCS and CCM in the manuscript (line 92-96).
- lines 124-126: I suggest including the description of the wind tunnel in the section of experimental devices and give additional operation parameters, such as the running flow, the time when you performed the assays (for example hours of scotophase) and the light conditions. These are very important parameters to get responses from moths in behavioral bioassays. Please also add this information for the olfactometer assays.

- line 126: pheromone source was a filter paper, a cotton wick, a dispenser? Please describe it.

We have removed experiment 2, Table 2 and related information in the manuscript according to the first reviewer’ comment.
- line 152: how did you release Z11-18:Ald, Z13-18:OH and Z11-18:OH with CCS, are they formulated in different dispensers? which load or concentration?

We had added these informations in the method section. (line 92-105)
- line 158: did you check for data normality? Please specify.

We did not check the data normality and we apologize for it. We have updated the description and data in the statistical analysis and result, and corrected the errors in the results.
- line 202: please replace Z11-18:OH with Z11-18:Ald, it is mistaken according to Figure 4.

Thank you for your point. We had done.
- line 214: I suggest replacing “insect species” with “Lepidoptera species”. I think insects is too broad and the cited reference is specifically about lepidopterans.

Done
- line 215: add author after *Tetanolita mynesalis* and the same with other species throughout the text (lines 216,217,218…).

Done
- line 230: I suggest adding a reference for examples of mating disruption using only one component of the pheromone blend, when it is multicomponent.

Done

- line 240: delete “(Lepidoptera: Tortricidae)” as it is already mentioned in line 218, and abbreviate *C. pomonella*.

Done
- line 244: I suggest replacing “demonstrated” with “suggested”, as it is not specifically demonstrated by the experiments.

Done
- line 250: “to control lepidopteran pests in rice” worldwide, so I suggest including references outside China.

Done
- line 251: the control effects of mating disruption? Please specify

Done
- line 255: “60% and 40%” refer to damage reduction? Please clarify

Done
- line 256: I suggest including “and the number of monitoring traps”

Done
- line 257: I suggest replacing “trap” with “capture”

Done
- line 264: I suggest replacing “field” with “trap”; it is not recommended to use “…sex pheromones of these two species together in the same trap”.

Done
- line 266: I would say “the biotechnological control with” instead of “biological control in”.

Done
- References: revise format according to journal guidelines

Done
- Figure 2: please delete “The” at the beginning. Add the type of trap employed and the type of commercial pheromone dispenser.

Done
- Figure 3: “…except the two commercial sex pheromones”, whose concentration or load is unknown? Please give details.

We answered it in previous comment. We have added the details in the Method-Chemicals.
- Figure 4 (a): x axis cannot be read, dates? Please amend. Moreover, please delete “The” at the beginning.

Done
- Figure 5: please delete “The” at the beginning.

Done
- Table 1: Experimental purpose of Experiment 1 needs correction: “To determine whether mixing the sex pheromones of *C. suppressalis* and *C. medinalis* interfere the capture of *C. suppressalis*”. Authors are not determining interference on *C. medinalis* captures because they did not include a trap baited only with CCM.

We answered it in previous comment. We have added the result of *C. medinalis* captures in Fig. 2b
- Table 2: add in the footnote the description of CCS, dispenser?

We answered it in previous comment. We have removed experiment 2, Table 2 and related information in the manuscript according to the first reviewer’ comment.

We look forward to hearing from you regarding our submission. We would be glad to respond to any further questions and comments that you may have.
