# Supplementary material for: Mating Disruption of Chilo suppressalis From Sex Pheromone of Another Pyralid Rice Pest Cnaphalocrocis medinalis (Lepidoptera: Pyralidae)
Source: Oxford University Press journal article supplement (doi:10.1093/jisesa/ieaa050), 2020-05-01
Supplement: ieaa050_suppl_supplementary_liang_review_files.zip [file ieaa050_suppl_supplementary_liang_review_files.zip › Liang revised figures.docx]

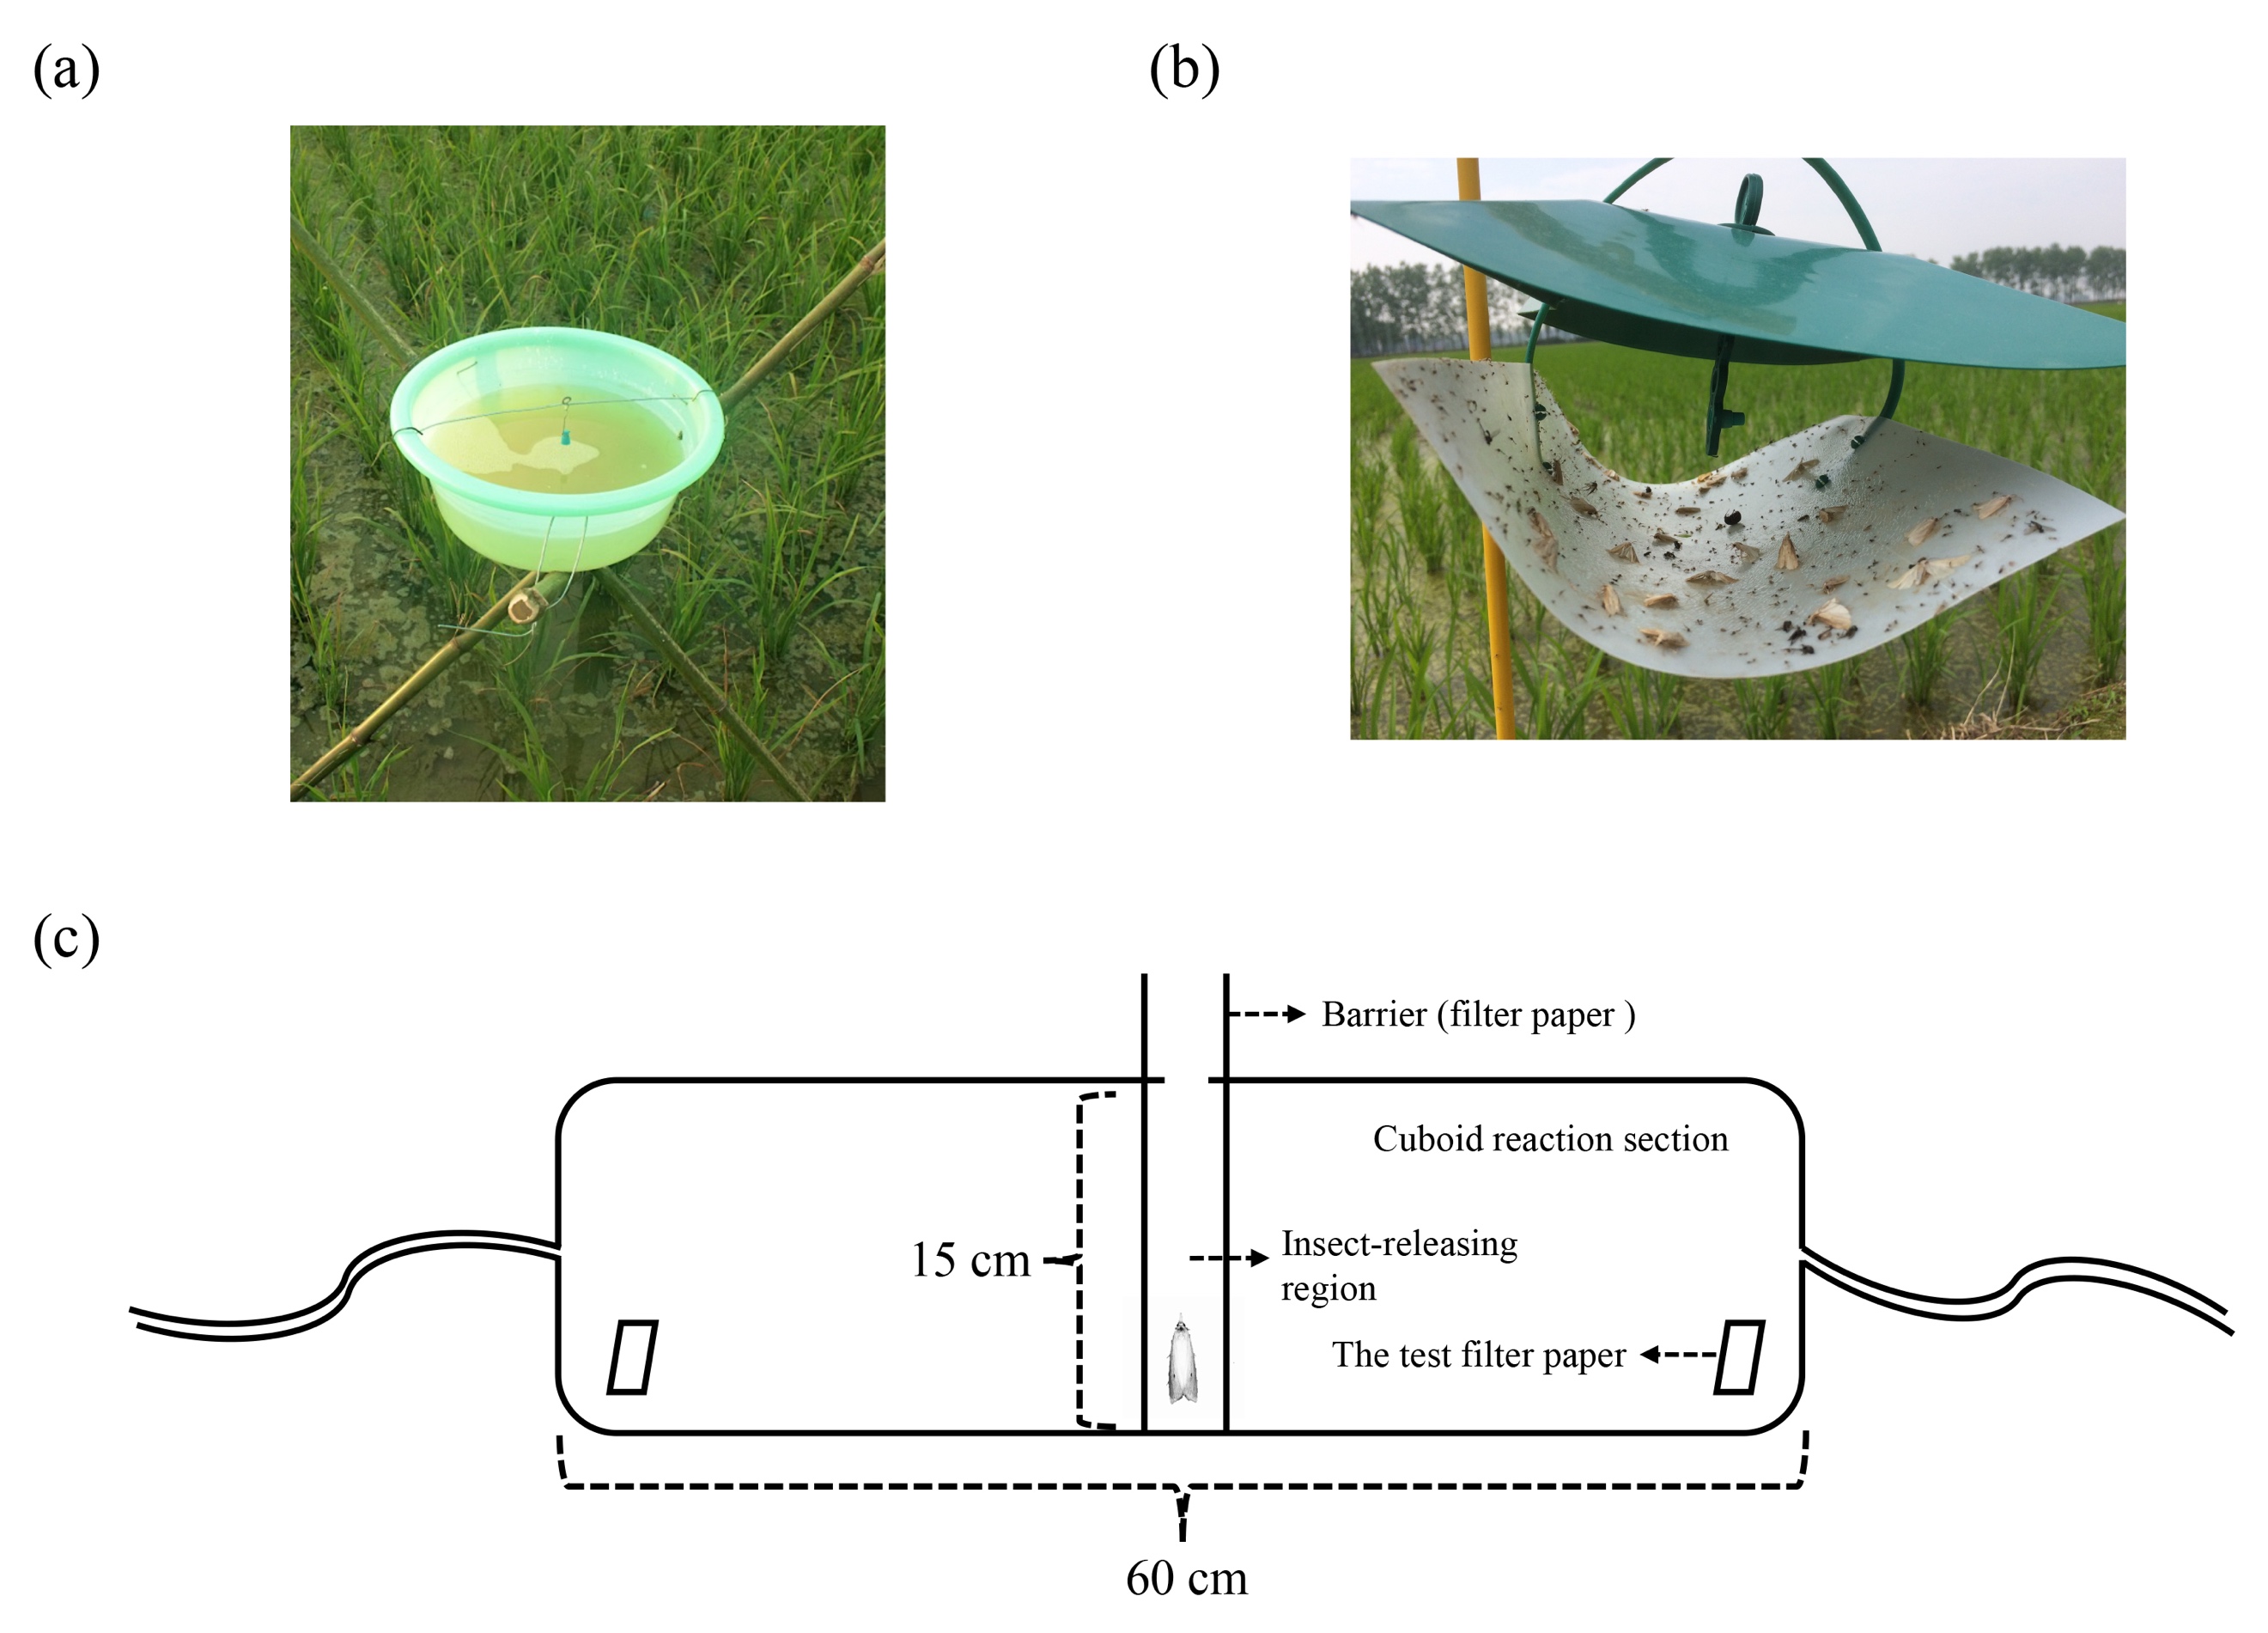


**Fig. 1** The schematic diagrams of three experimental devices in this study. (a) trap 1, (b) trap 2 and (c) olfactometer.


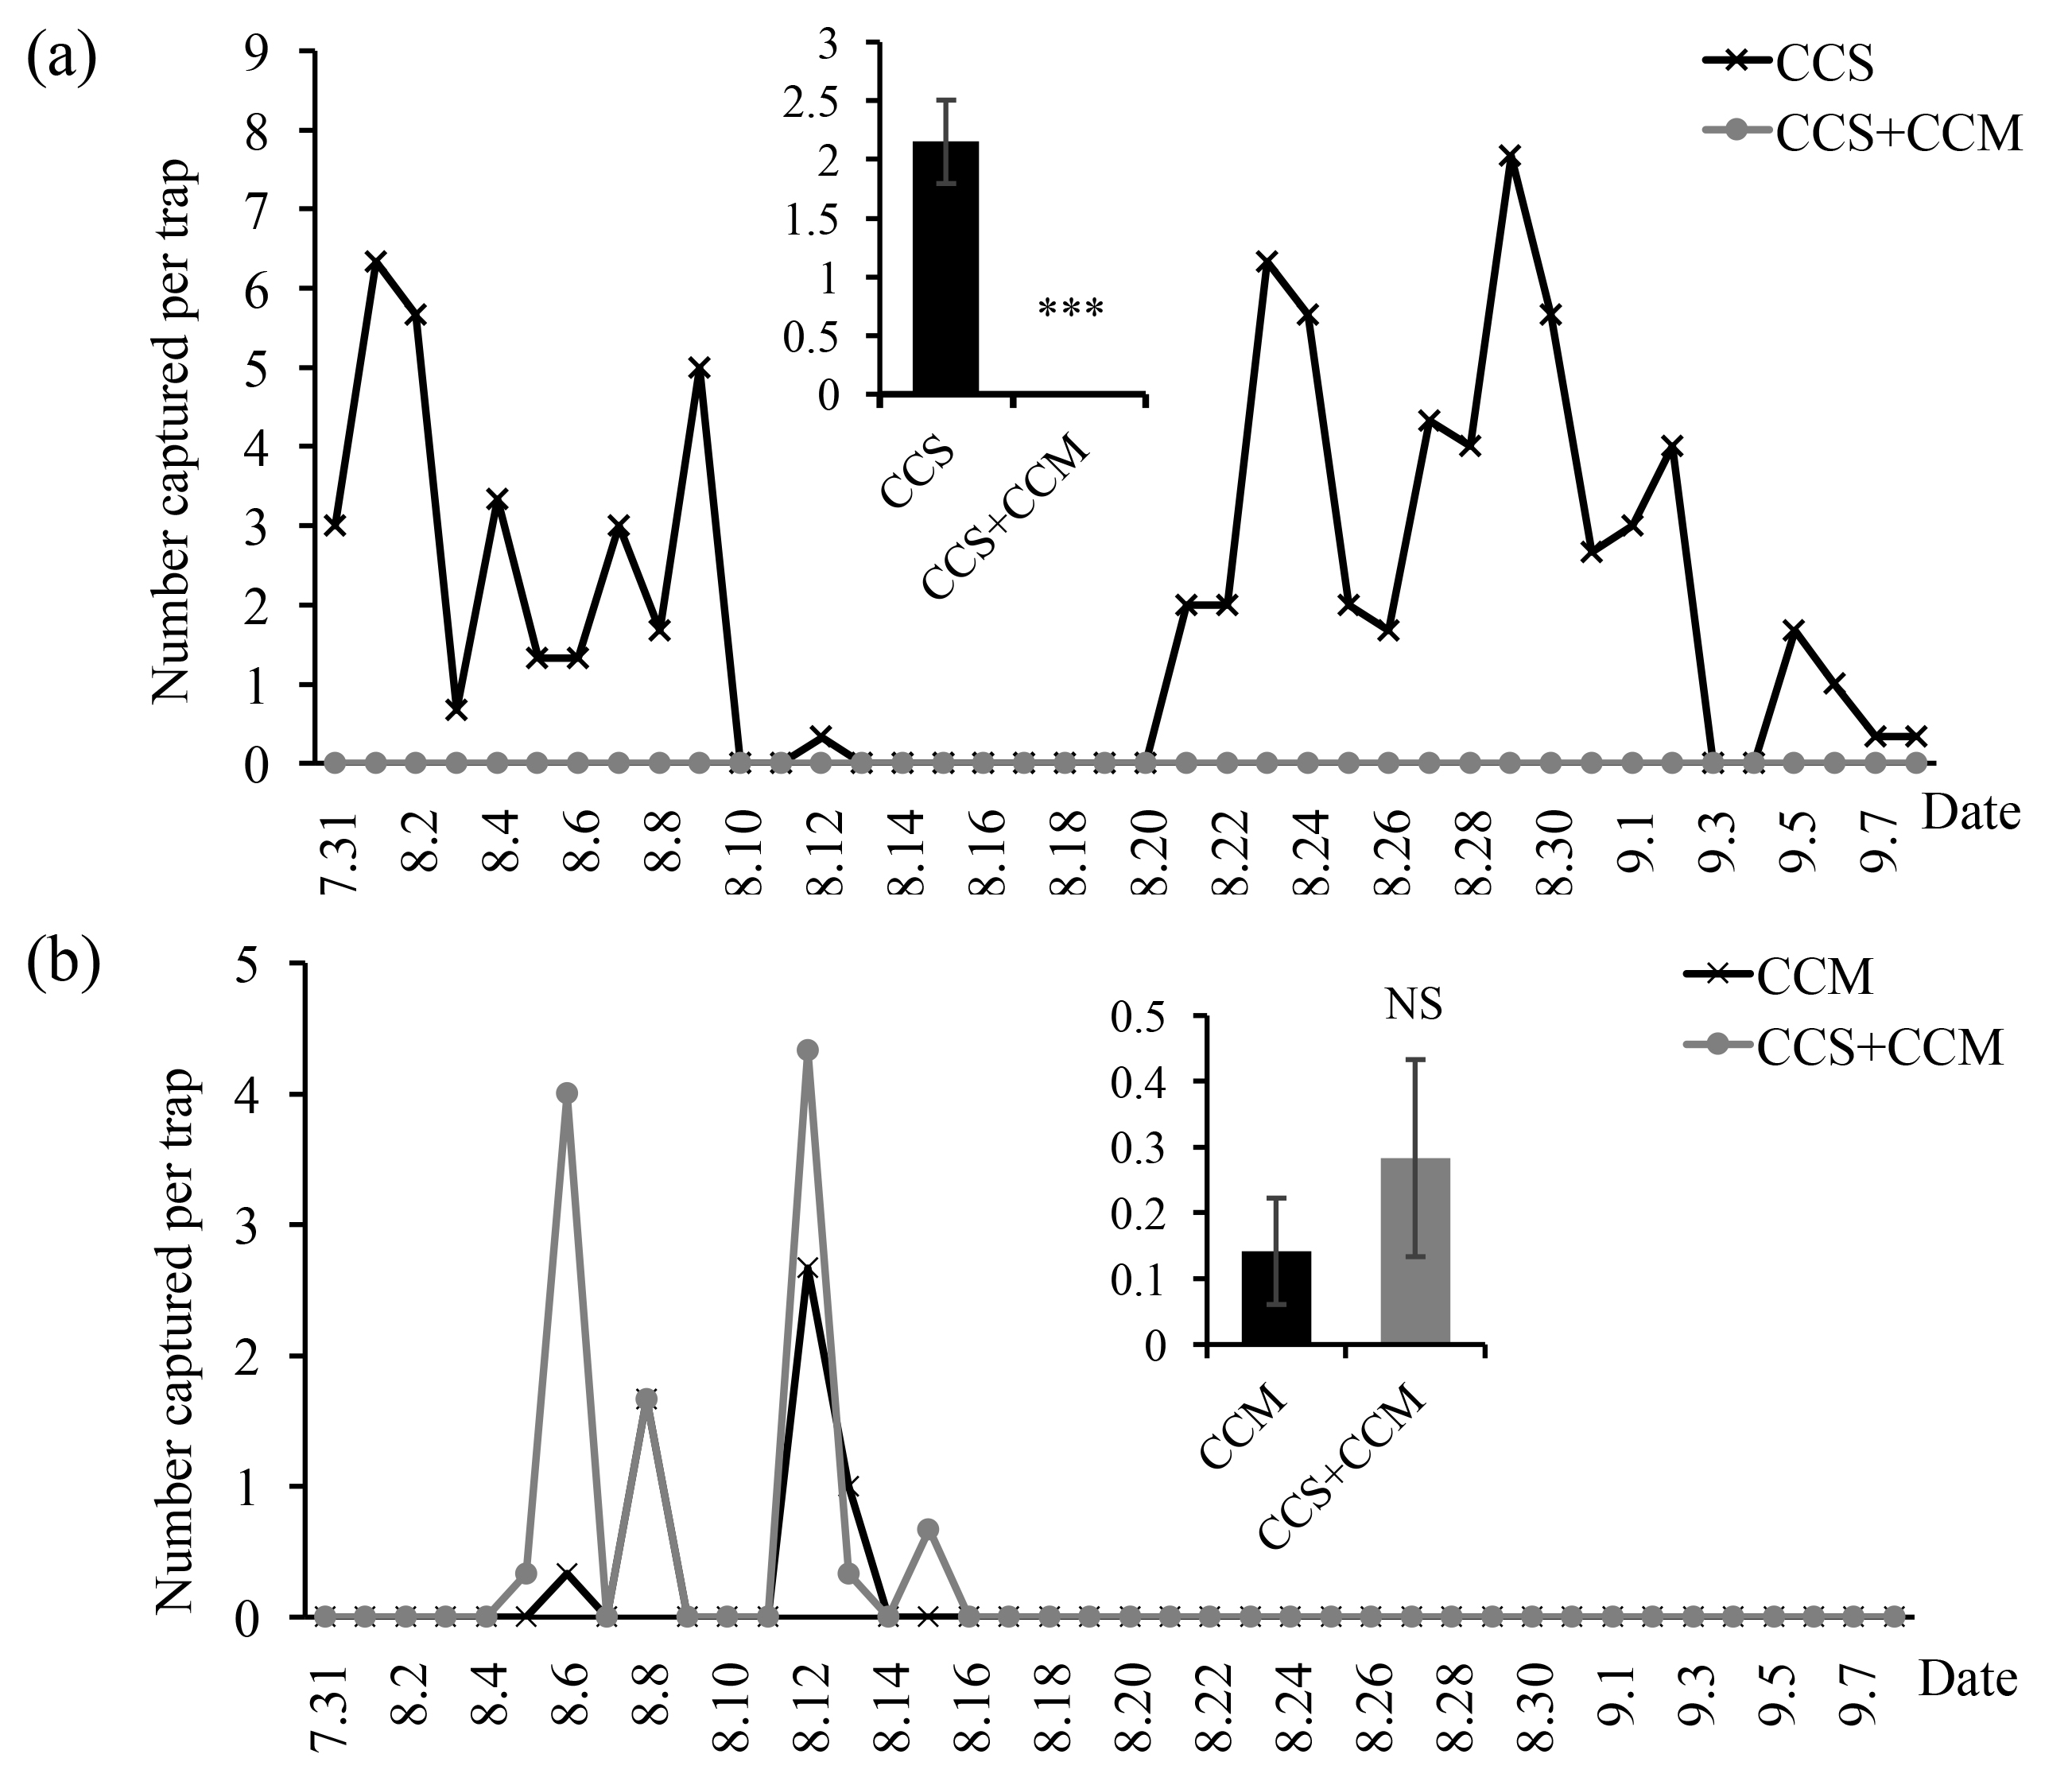


**Fig. 2** Number of *C. suppressalis* (a) and *C. medinalis* (b) males captured by their commercial sex pheromone alone (CCS or CCM) (black) and combined with these two sex pheromone (CCS+CCM) (gray) in Jiangxi, China, from July to September 2012. we used trap 1 in the field experiment. CCS: commercial sex pheromones of *C. suppressalis*, CCM: commercial sex pheromones of *C. medinalis*, CCS+CCM: combination of commercial sex pheromonesof *C. suppressalis* and *C. medinalis*. We compared the difference of capture of *C. suppressalis* and *C. medinalis* males between treatments and control treatment with Mann-Whitney *U* test. ***, *P* < 0.001, NS, no significance.


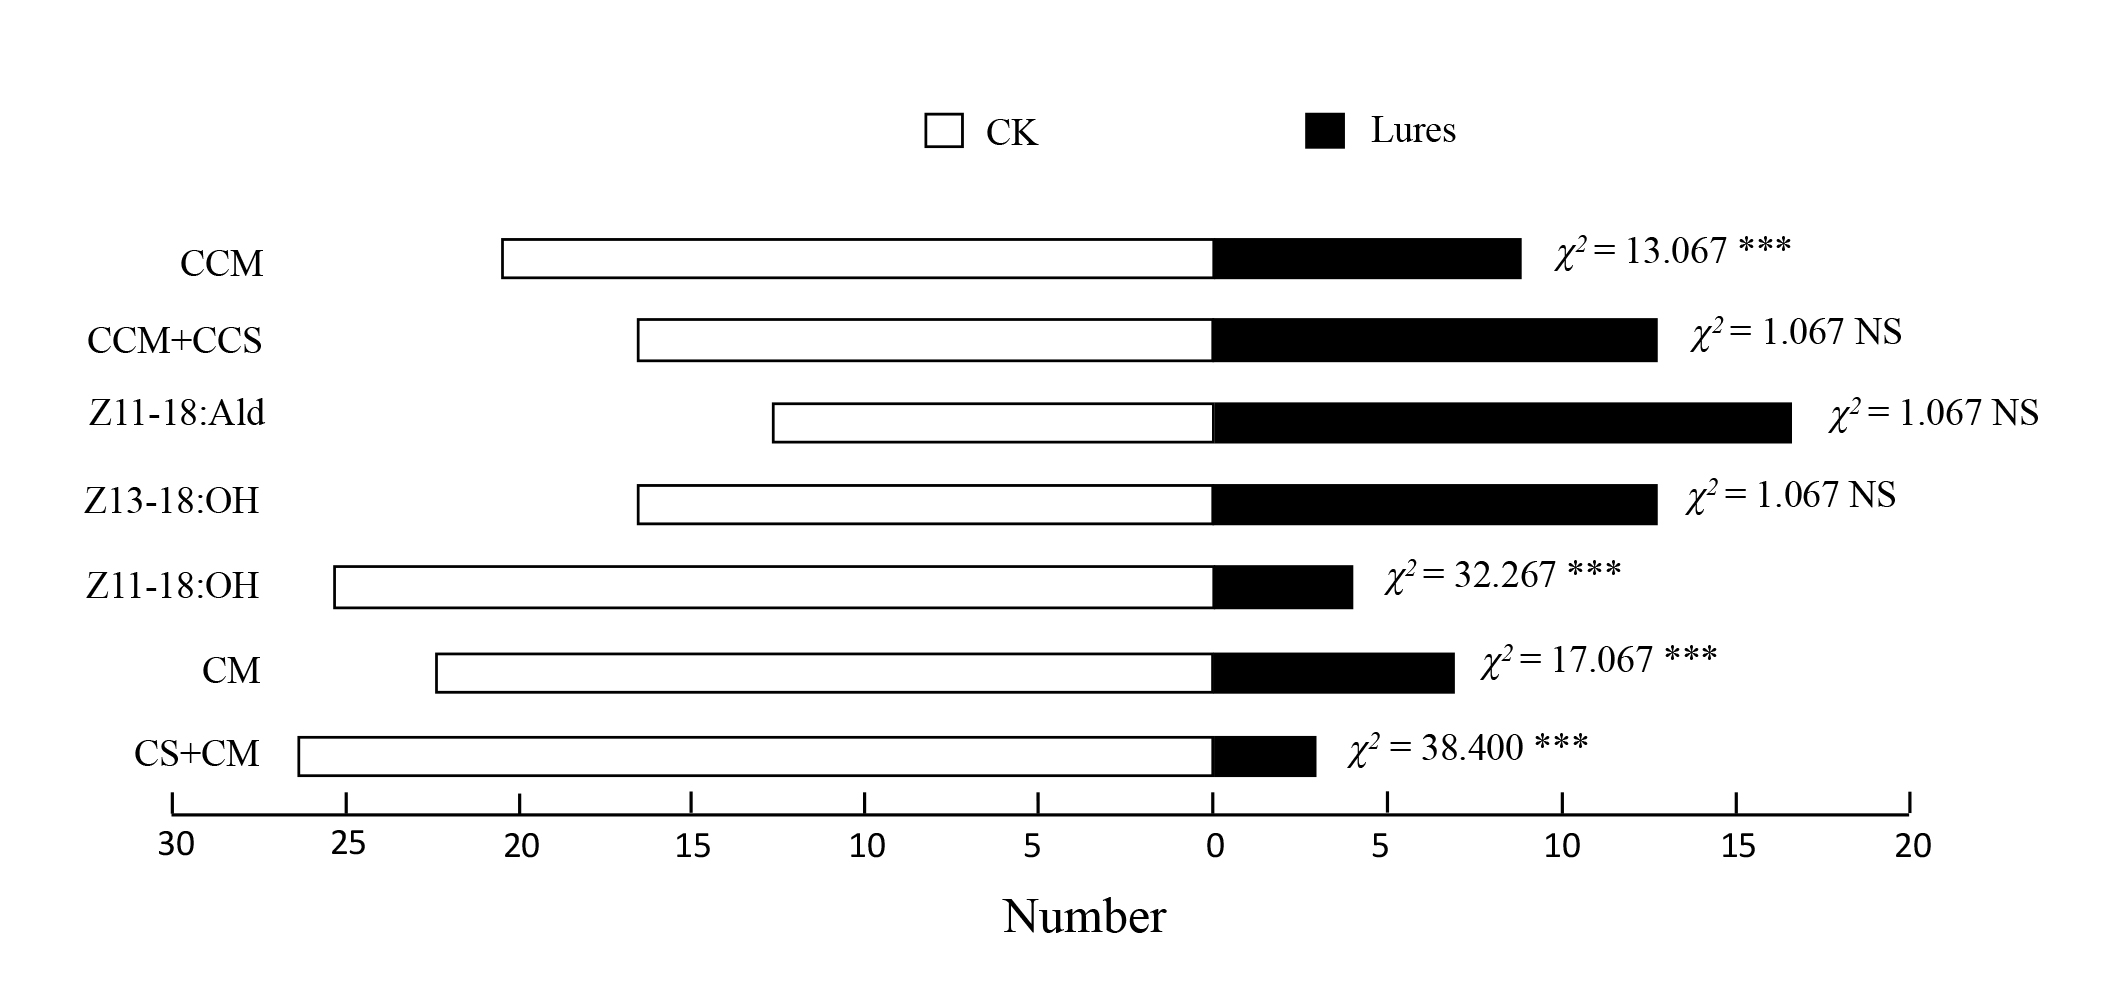


**Fig. 3** Avoidance effects of seven lures on the responses of male *C. suppressalis* in an olfactometer (two choices). CCM means commercial *C. medinalis* sex pheromone; CCM+CCS means combination of commercial *C. medinalis* and *C. suppressalis* sex pheromones; CM means the four components of *C. medinalis* sex pheromone (Z13-18:Ald, Z13-18:OH, Z11-18:Ald, Z11-18:OH=100:36:11:24); CS+CM means combination of the components of *C. suppressalis* and *C. medinalis* sex pheromones (Z11-16:Ald, Z13-18:Ald, Z9-16:Ald, Z13-18:OH, Z11-18:Ald, Z11-18:OH=46:106:5:36:11:24). The concentrations of the lures are 1 μg/μl except the two commercial sex pheromones. The control (CK) is redistilled hexane. Significance levels of χ2 (*Chi*-square test) indicated by *** (*P* < 0.001) or NS (no significant difference). *N* = 30.


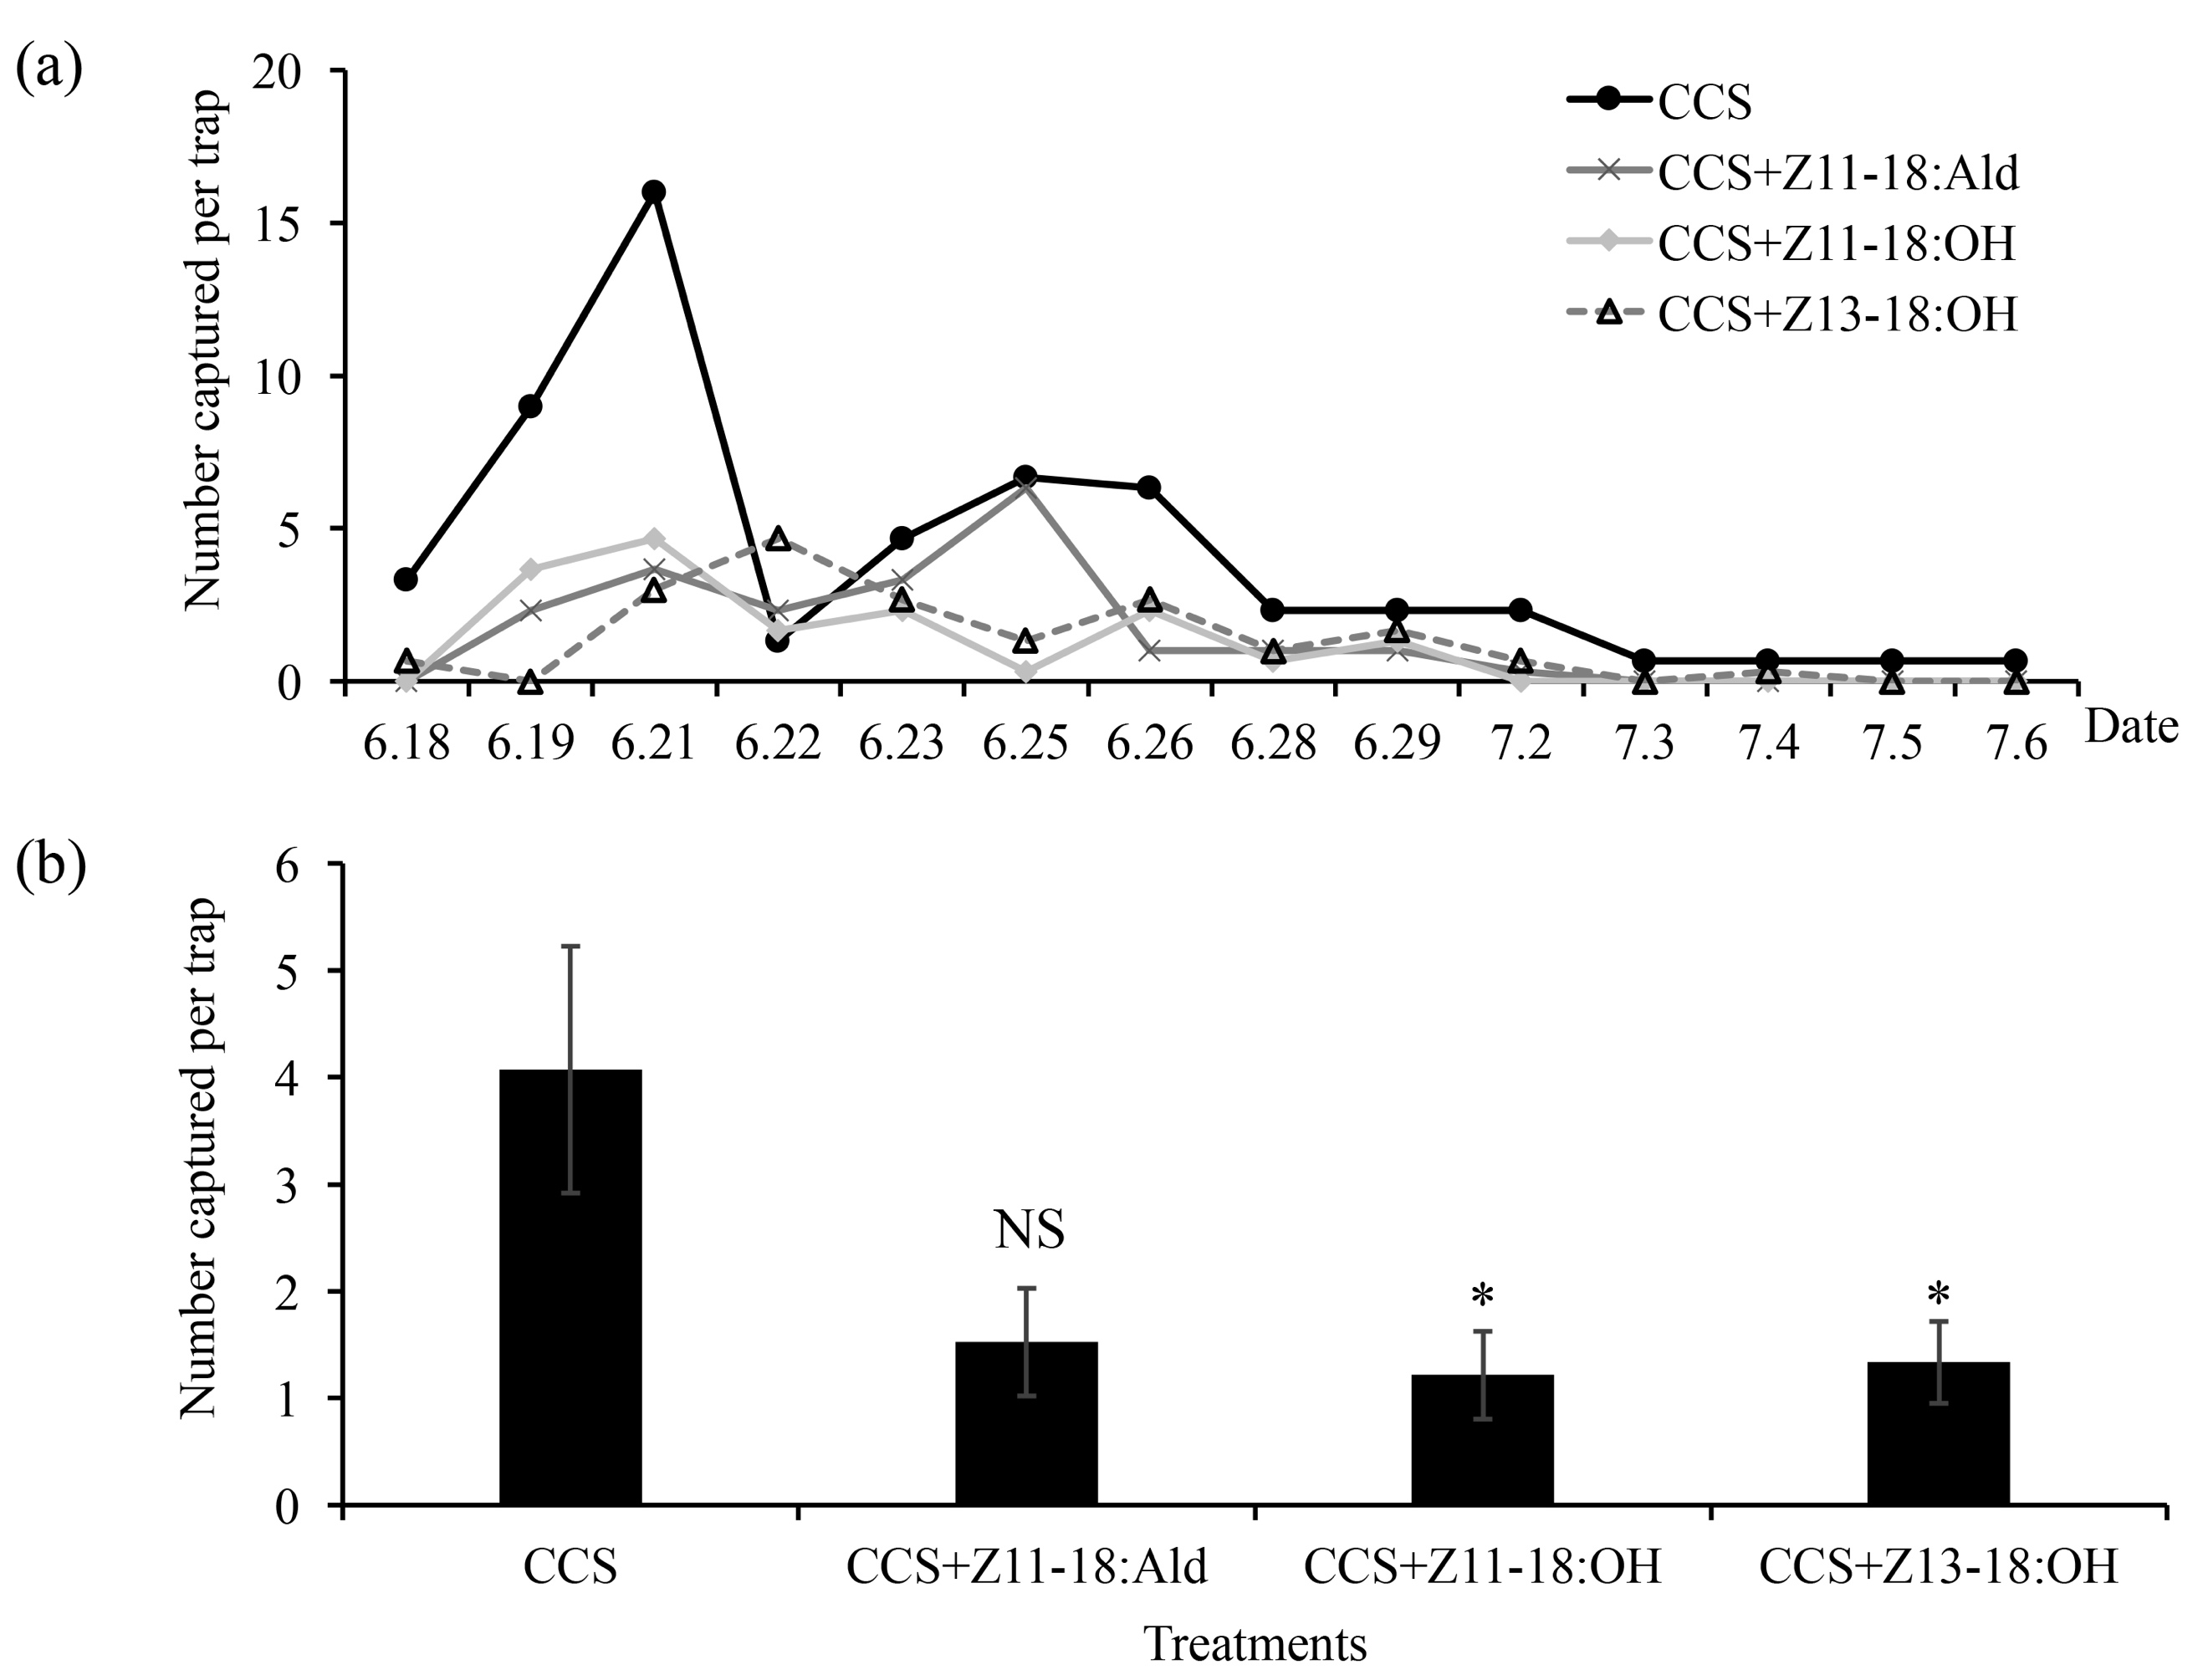


**Fig. 4** Dynamic linear graph (a) and summary graph (b) of number of *C. suppressalis* males captured by commercial *C. suppressalis* sex pheromone alone (CCS) and combined with the components of *C. medinalis* sex pheromone (Z11-18:Ald, Z11-18:OH, Z13-18:OH) in Jiangxi, China, from June to July 2014. The difference of captureof *C. suppressalis* males between treatments and control treatment were analyzed with Mann-Whitney *U* test. *, *P* < 0.05; NS, no significant difference.


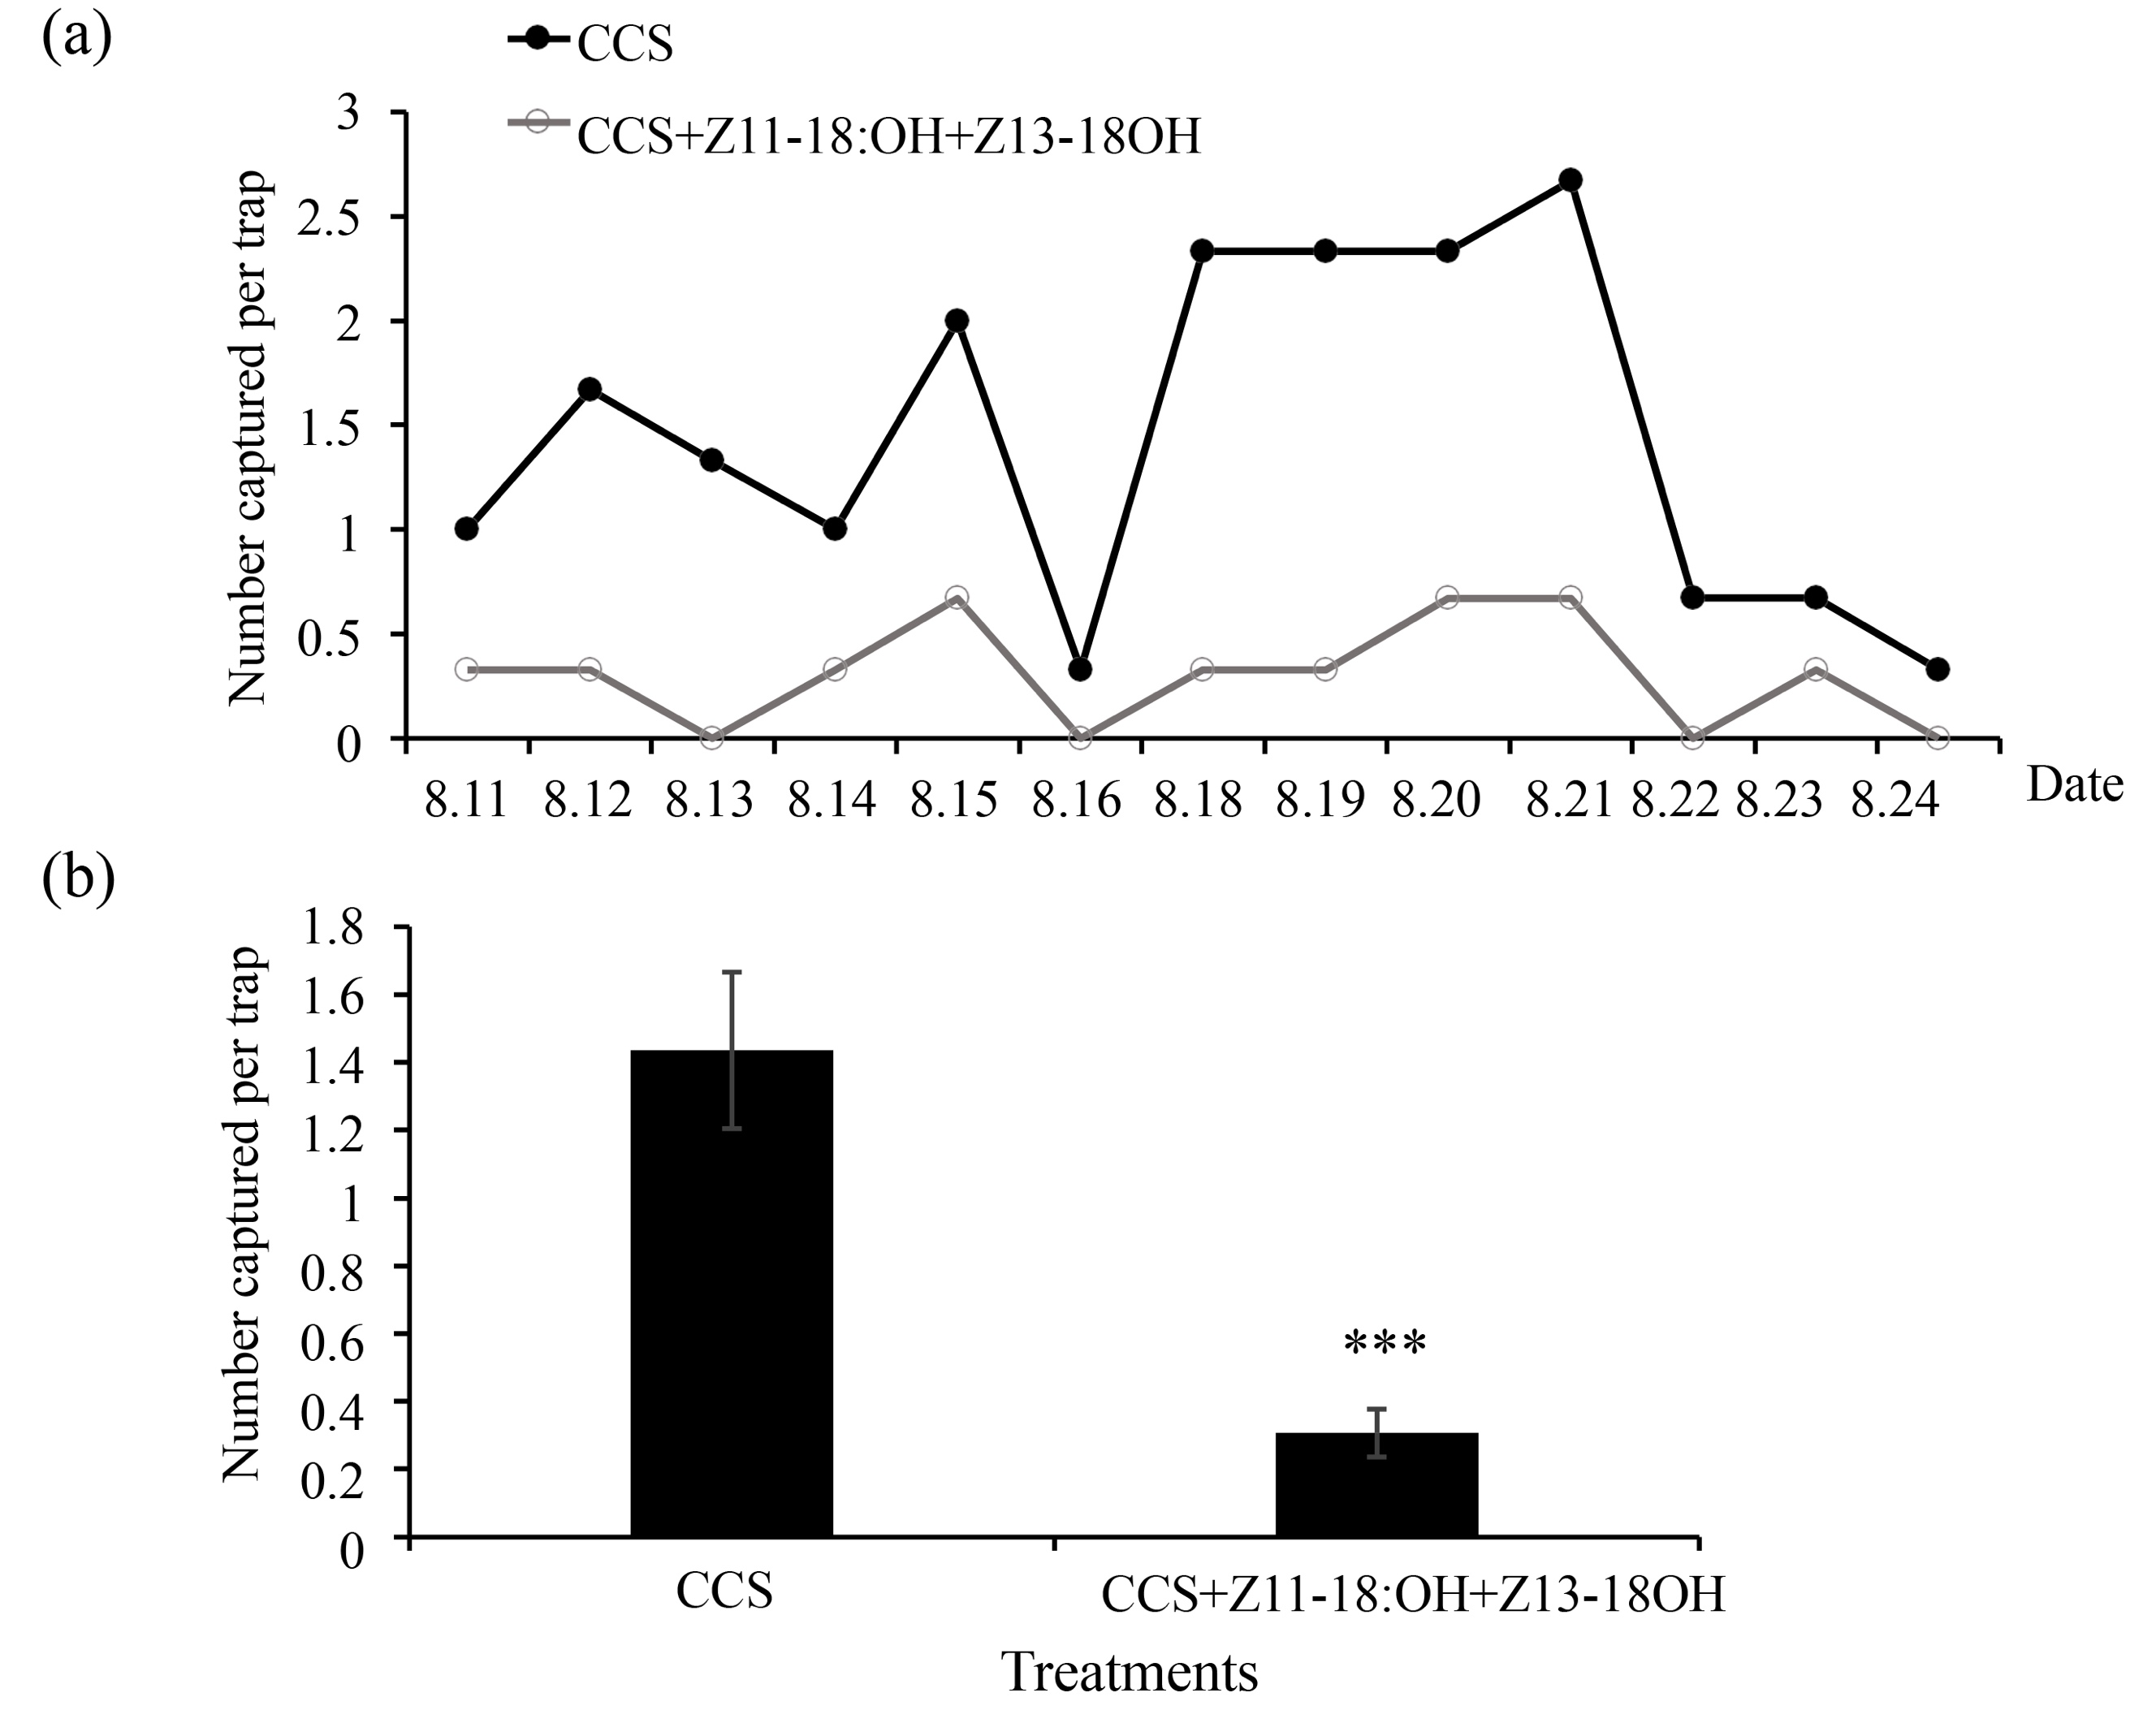


**Fig. 5** Dynamic linear graph (a) and summary graph (b) of number of *C. suppressalis* males captured by commercial *C. suppressalis* sex pheromone alone (CCS) and CCS plus individual components (Z11-18:OH and Z13-18:OH). The difference of captureof *C. suppressalis* males between treatments and control treatment were analyzed with Mann-Whitney *U* test. ***, *P* < 0.001.

Table 1 The experimental design

| **Experiment** | **Experimental purpose** | **Experimental device** | **Time** |
| --- | --- | --- | --- |
| Experiment 1 | To determine whether mixing the sex pheromones of *C. suppressalis* and *C. medinalis* interfere the capture of *C. suppressalis* and *C. medinalis* | Trap 1 | July to September 2012 |
| Experiment 2 | To test the avoidance response of *C. suppressalis* male to sex pheromone components of *C. medinalis* | Olfactometer | July to August 2013 |
| Experiment 3 | To examine the effects of the sex pheromone components of *C. medinalis* on *C. suppressalis* in the field | Trap 2 | June to August 2014 |
